# Supplementary material for: Identification of 7-Ketocholesterol-Modulated Pathways and Sterculic Acid Protective Effect in Retinal Pigmented Epithelium Cells by Using Genome-Wide Transcriptomic Analysis
Source: MDPI journal article supplement (doi:10.3390/ijms24087459), 2023-04-18
Supplement: s1 [file s1]

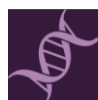

**Table S1.** Complete list of DEGs found between control mRPE cells and treated with 15  $\mu$ M 7KCh. Positive Log2FC represents upregulated genes while negative Log2FC represents downregulated genes.

| Ensemble ID        | Gene ID         | Log2FC | FDR      | Gene description                                         |
|--------------------|-----------------|--------|----------|----------------------------------------------------------|
| ENSMMUG00000001226 | <i>HMGC1</i>    | -3.10  | 2.56E-51 | 3-hydroxy-3-methylglutaryl-CoA synthase 1                |
| ENSMMUG00000003535 | <i>SQLE</i>     | -2.11  | 1.36E-44 | squalene epoxidase                                       |
| ENSMMUG00000022329 | <i>LSS</i>      | -2.08  | 6.49E-44 | lanosterol synthase                                      |
| ENSMMUG00000039955 | <i>MSMO1</i>    | -2.20  | 2.28E-42 | methylsterol monooxygenase 1                             |
| ENSMMUG00000017115 | <i>IDI1</i>     | -2.27  | 5.27E-40 | isopentenyl-diphosphate delta isomerase 1                |
| ENSMMUG00000014326 | <i>MVD</i>      | -2.40  | 4.33E-37 | mevalonate diphosphate decarboxylase                     |
| ENSMMUG00000038190 | <i>CYP51A1</i>  | -1.85  | 4.36E-30 | lanosterol 14-alpha demethylase                          |
| ENSMMUG00000044056 | <i>EBP</i>      | -1.62  | 5.87E-28 | EBP cholesterol delta-isomerase                          |
| ENSMMUG00000047977 | <i>INSIG1</i>   | -2.09  | 9.80E-28 | insulin induced gene 1                                   |
| ENSMMUG00000019211 | <i>FDFT1</i>    | -1.45  | 1.38E-26 | farnesyl-diphosphate farnesyltransferase 1               |
| ENSMMUG00000018058 | <i>ABCG1</i>    | 2.95   | 9.60E-21 | ATP binding cassette subfamily G member 1                |
| ENSMMUG00000021577 | <i>DHCR24</i>   | -1.58  | 1.58E-20 | 24-dehydrocholesterol reductase                          |
| ENSMMUG00000023144 | <i>FDPS</i>     | -1.25  | 2.49E-20 | farnesyl diphosphate synthase                            |
| ENSMMUG00000023089 | <i>PHGDH</i>    | 2.90   | 6.43E-20 | phosphoglycerate dehydrogenase                           |
| ENSMMUG00000016698 | <i>PNPLA3</i>   | -1.48  | 1.75E-19 | patatin like phospholipase domain containing 3           |
| ENSMMUG00000000006 | <i>NEURL3</i>   | 3.72   | 6.12E-19 | neuralized E3 ubiquitin protein ligase 3                 |
| ENSMMUG00000017932 | <i>HMGR</i>     | -1.65  | 3.23E-17 | 3-hydroxy-3-methylglutaryl-CoA reductase                 |
| ENSMMUG00000006139 | <i>ACSS2</i>    | -1.31  | 3.23E-17 | acyl-CoA synthetase short chain family member 2          |
| ENSMMUG00000011845 | <i>HK2</i>      | 1.70   | 8.68E-17 | hexokinase 2                                             |
| ENSMMUG00000013176 | <i>NSDHL</i>    | -1.18  | 1.82E-16 | NAD(P) dependent steroid dehydrogenase-like              |
| ENSMMUG00000014520 | <i>ITIH1</i>    | -3.68  | 6.68E-16 | inter-alpha-trypsin inhibitor heavy chain 1              |
| ENSMMUG00000011976 | <i>DHCR7</i>    | -1.48  | 8.29E-15 | 7-dehydrocholesterol reductase                           |
| ENSMMUG00000001618 | <i>ATP6V0D2</i> | 6.06   | 1.44E-14 | ATPase H <sup>+</sup> transporting V0 subunit d2         |
| ENSMMUG00000020608 | <i>ABCA1</i>    | 1.83   | 1.91E-14 | ATP binding cassette subfamily A member 1                |
| ENSMMUG00000003288 | <i>GPT2</i>     | 1.61   | 9.13E-14 | glutamic--pyruvic transaminase 2                         |
| ENSMMUG00000018773 | <i>TM7SF2</i>   | -1.30  | 5.37E-13 | transmembrane 7 superfamily member 2                     |
| ENSMMUG00000009332 | <i>HSD17B7</i>  | -1.08  | 7.85E-12 | 3-keto-steroid reductase                                 |
| ENSMMUG00000018907 | <i>ERFE</i>     | 1.85   | 1.35E-10 | Erythroferrone                                           |
| ENSMMUG00000011245 | <i>CRISPLD2</i> | -1.23  | 2.09E-10 | cysteine rich secretory protein LCCL domain containing 2 |
| ENSMMUG00000011868 | <i>PSAT1</i>    | 3.00   | 2.27E-10 | phosphoserine aminotransferase 1                         |
| ENSMMUG00000039289 | <i>SC5D</i>     | -1.41  | 4.75E-10 | sterol-C5-desaturase                                     |
| ENSMMUG00000008140 | <i>SGK1</i>     | 1.31   | 1.28E-09 | serum/glucocorticoid regulated kinase 1                  |
| ENSMMUG00000019653 | <i>SLC7A8</i>   | -1.05  | 1.69E-09 | solute carrier family 7 member 8                         |
| ENSMMUG00000005742 | <i>CDCP1</i>    | 1.92   | 5.05E-09 | CUB domain containing protein 1                          |
| ENSMMUG00000021806 | <i>VGLL4</i>    | -1.00  | 7.59E-09 | vestigial like family member 4                           |
| ENSMMUG00000000484 | <i>C2CD4C</i>   | -2.28  | 1.04E-08 | C2 calcium dependent domain containing 4                 |
| ENSMMUG00000012185 | <i>ATF3</i>     | 3.16   | 1.58E-08 | activating transcription factor 3                        |
| ENSMMUG00000003273 | <i>BCAM</i>     | -1.16  | 1.94E-08 | basal cell adhesion molecule                             |
| ENSMMUG00000012811 | <i>FASN</i>     | -1.17  | 2.21E-08 | fatty acid synthase                                      |
| ENSMMUG00000000567 | <i>BAMBI</i>    | -1.01  | 4.50E-08 | MP and activin membrane bound inhibitor                  |
| ENSMMUG00000011663 | <i>MVK</i>      | -1.13  | 4.66E-08 | mevalonate kinase                                        |
| ENSMMUG00000018931 | <i>STARD4</i>   | -1.28  | 7.19E-08 | StAR related lipid transfer domain containing 4          |
| ENSMMUG00000008563 | <i>ACLY</i>     | -0.76  | 7.19E-08 | ATP citrate lyase                                        |
| ENSMMUG00000004504 | <i>KITLG</i>    | 3.19   | 9.75E-08 | KIT ligand                                               |

|                    |                  |       |          |                                                                                    |
|--------------------|------------------|-------|----------|------------------------------------------------------------------------------------|
| ENSMMUG00000000327 | <i>FADS2</i>     | -1.02 | 1.05E-07 | fatty acid desaturase 2                                                            |
| ENSMMUG00000013610 | <i>ETV5</i>      | 1.42  | 1.33E-07 | ETS variant transcription factor 5                                                 |
| ENSMMUG00000009289 | <i>CBS</i>       | 1.26  | 1.76E-07 | cystathionine beta-synthase                                                        |
| ENSMMUG00000002605 | <i>UCP2</i>      | -1.00 | 1.84E-07 | uncoupling protein 2                                                               |
| ENSMMUG00000013507 | <i>LAD1</i>      | -1.26 | 2.26E-07 | ladinin 1                                                                          |
| ENSMMUG00000010817 | <i>SCD</i>       | -0.93 | 2.26E-07 | stearoyl-CoA desaturase                                                            |
| ENSMMUG00000009852 | <i>CASP1</i>     | 1.40  | 3.21E-07 | caspase-1                                                                          |
| ENSMMUG00000019157 | <i>CTH</i>       | 2.31  | 3.62E-07 | cystathionine gamma-lyase                                                          |
| ENSMMUG00000019326 | <i>ASNS</i>      | 1.88  | 3.62E-07 | asparagine synthetase (glutamine-hydrolyzing)                                      |
| ENSMMUG00000011909 | <i>RBP3</i>      | -1.16 | 6.97E-07 | retinol binding protein 3                                                          |
| ENSMMUG00000041958 | <i>BHLHA15</i>   | 3.97  | 7.70E-07 | basic helix-loop-helix family member a15                                           |
| ENSMMUG00000009022 | <i>GDPD5</i>     | -1.09 | 8.06E-07 | glycerophosphodiester phosphodiesterase domain containing 5                        |
| ENSMMUG00000009739 | <i>MTHFD2</i>    | 1.41  | 9.38E-07 | methylenetetrahydrofolate dehydrogenase 2, methenyltetrahydrofolate cyclohydrolase |
| ENSMMUG00000038480 | <i>EIF4EBP1</i>  | 1.42  | 1.26E-06 | eukaryotic translation initiation factor 4E binding protein 1                      |
| ENSMMUG00000020322 | <i>ALDOC</i>     | -1.09 | 1.32E-06 | Aldolase, fructose-bisphosphate C                                                  |
| ENSMMUG00000005947 | <i>SAMD11</i>    | -1.14 | 1.53E-06 | sterile alpha motif domain containing 11                                           |
| ENSMMUG00000006269 | <i>CSTA</i>      | 2.21  | 2.31E-06 | cystatin A                                                                         |
| ENSMMUG00000019996 | <i>ENC1</i>      | -0.92 | 2.60E-06 | ectodermal-neural cortex 1                                                         |
| ENSMMUG00000006971 | <i>FKBP11</i>    | 0.99  | 3.06E-06 | FKBP prolyl isomerase 11                                                           |
| ENSMMUG00000007090 | <i>DOK5</i>      | 1.22  | 3.48E-06 | docking protein 5                                                                  |
| ENSMMUG00000015474 | <i>MYLIP</i>     | 0.84  | 4.52E-06 | myosin regulatory light chain interacting protein                                  |
| ENSMMUG00000044653 | <i>SLC38A10</i>  | -0.87 | 5.66E-06 | solute carrier family 38 member 10                                                 |
| ENSMMUG00000003292 | <i>CLDN4</i>     | 2.75  | 5.66E-06 | claudin 4                                                                          |
| ENSMMUG00000009084 | <i>TM6SF1</i>    | 2.16  | 7.20E-06 | transmembrane 6 superfamily member 1                                               |
| ENSMMUG00000011593 | <i>RGCC</i>      | 3.60  | 8.50E-06 | regulator of cell cycle                                                            |
| ENSMMUG00000001119 | <i>UTS2R</i>     | -2.21 | 8.53E-06 | urotensin 2 receptor                                                               |
| ENSMMUG00000040573 | <i>PMAIP1</i>    | 1.30  | 9.07E-06 | phorbol-12-myristate-13-acetate-induced protein 1                                  |
| ENSMMUG00000017561 | <i>SLC43A2</i>   | -1.31 | 9.79E-06 | solute carrier family 43 member 2                                                  |
| ENSMMUG00000014176 | <i>CYTIP</i>     | 1.16  | 1.03E-05 | cytohesin 1 interacting protein                                                    |
| ENSMMUG00000022893 | <i>VWF</i>       | -3.52 | 1.21E-05 | von Willebrand factor                                                              |
| ENSMMUG00000007037 | <i>UPP1</i>      | 2.05  | 1.28E-05 | uridine phosphorylase 1                                                            |
| ENSMMUG00000012064 | <i>C7H14orf1</i> | -0.97 | 1.66E-05 | ergosterol biosynthesis 28 homolog                                                 |
| ENSMMUG00000010927 | <i>TNFAIP6</i>   | 2.26  | 1.85E-05 | TNF alpha induced protein 6                                                        |
| ENSMMUG00000013798 | <i>FADS1</i>     | -0.82 | 1.86E-05 | fatty acid desaturase 1                                                            |
| ENSMMUG00000005217 | <i>HSPA5</i>     | 1.36  | 1.94E-05 | heat shock protein family A (Hsp70) member 5                                       |
| ENSMMUG00000014542 | <i>CHAC1</i>     | 2.46  | 1.97E-05 | ChaC glutathione specific gamma-glutamylcystotransferase 1                         |
| ENSMMUG00000038425 | <i>GADD45A</i>   | 0.70  | 1.99E-05 | growth arrest and DNA damage inducible alpha                                       |
| ENSMMUG00000012718 | <i>DPYSL2</i>    | -0.68 | 2.17E-05 | dihydropyrimidinase like 2                                                         |
| ENSMMUG00000010601 | <i>PRG2</i>      | 2.24  | 2.22E-05 | proteoglycan 2, pro-eosinophil major basic protein                                 |
| ENSMMUG00000017169 | <i>FAM107B</i>   | 1.23  | 2.77E-05 | family with sequence similarity 107 member B                                       |
| ENSMMUG00000009223 | <i>PPP1R15A</i>  | 1.56  | 2.77E-05 | protein phosphatase 1 regulatory subunit 15A                                       |
| ENSMMUG00000004771 | <i>CXCL14</i>    | -1.03 | 3.50E-05 | C-X-C motif chemokine ligand 14                                                    |
| ENSMMUG00000019992 | <i>GRB10</i>     | 1.64  | 3.53E-05 | growth factor receptor bound protein 10                                            |
| ENSMMUG00000017327 | <i>SLAMF7</i>    | 2.79  | 3.60E-05 | SLAM family member 7                                                               |
| ENSMMUG00000017916 | <i>LIPE</i>      | -0.91 | 3.88E-05 | lipase E, hormone sensitive type                                                   |
| ENSMMUG00000009349 | <i>ACACA</i>     | -0.69 | 4.43E-05 | acetyl-CoA carboxylase alpha                                                       |
| ENSMMUG00000019777 | <i>IL1A</i>      | 2.85  | 4.87E-05 | interleukin 1 alpha                                                                |
| ENSMMUG00000016230 | <i>TMEM63B</i>   | -0.73 | 4.88E-05 | transmembrane protein 63B                                                          |
| ENSMMUG00000041773 | <i>MYC</i>       | 0.78  | 4.90E-05 | MYC proto-oncogene, bHLH transcription factor                                      |
| ENSMMUG00000014601 | <i>FABP5</i>     | 0.80  | 4.90E-05 | fatty acid binding protein 5                                                       |

|                    |                 |       |          |                                                           |
|--------------------|-----------------|-------|----------|-----------------------------------------------------------|
| ENSMMUG00000017470 | <i>THRSP</i>    | -2.46 | 5.41E-05 | thyroid hormone responsive                                |
| ENSMMUG00000007027 | <i>ACTC1</i>    | -1.55 | 5.62E-05 | actin alpha cardiac muscle 1                              |
| ENSMMUG00000020806 | <i>ABCC9</i>    | 2.48  | 6.32E-05 | ATP binding cassette subfamily C member 9                 |
| ENSMMUG00000023801 | <i>LCN2</i>     | 4.72  | 6.55E-05 | lipocalin 2                                               |
| ENSMMUG00000023643 | <i>NFKBIB</i>   | 1.03  | 7.77E-05 | NFKB inhibitor beta                                       |
| ENSMMUG00000015851 | <i>SFRP2</i>    | -0.69 | 8.87E-05 | secreted frizzled related protein 2                       |
| ENSMMUG00000028717 | <i>PTPRH</i>    | 1.22  | 9.02E-05 | protein tyrosine phosphatase receptor type H              |
| ENSMMUG00000003874 | <i>CTSD</i>     | -0.71 | 9.28E-05 | cathepsin D                                               |
| ENSMMUG00000004628 | <i>IARS</i>     | 0.72  | 9.60E-05 | isoleucyl-tRNA synthetase 1                               |
| ENSMMUG00000015314 | <i>TSPAN15</i>  | -0.66 | 1.08E-04 | tetraspanin 15                                            |
| ENSMMUG00000013589 | <i>ACBD4</i>    | -0.74 | 1.31E-04 | acyl-CoA binding domain containing 4                      |
| ENSMMUG00000001048 | <i>EAF2</i>     | 1.11  | 1.44E-04 | ELL associated factor 2                                   |
| ENSMMUG00000013407 | <i>ADAMTS1</i>  | 0.78  | 1.65E-04 | ADAM metalloproteinase with thrombospondin type 1 motif 1 |
| ENSMMUG00000047896 | <i>TP53INP1</i> | -0.80 | 1.69E-04 | tumor protein p53 inducible nuclear protein 1             |
| ENSMMUG00000007659 | <i>XPOT</i>     | 0.77  | 1.71E-04 | exportin for Trna                                         |
| ENSMMUG00000006127 | <i>CEBPG</i>    | 1.09  | 1.71E-04 | CCAAT enhancer binding protein gamma                      |
| ENSMMUG00000015001 | <i>LIMK2</i>    | -0.72 | 1.72E-04 | LIM domain kinase 2                                       |
| ENSMMUG00000004719 | <i>GARS</i>     | 1.02  | 1.75E-04 | glycyl-tRNA synthetase 1                                  |
| ENSMMUG00000004706 | <i>TBL2</i>     | 0.85  | 1.75E-04 | transducin beta like 2                                    |
| ENSMMUG00000042454 | <i>PHLDA1</i>   | 1.15  | 1.75E-04 | pleckstrin homology like domain family A member 1         |
| ENSMMUG00000009093 | <i>IGSF9</i>    | -0.80 | 1.75E-04 | immunoglobulin superfamily member 9                       |
| ENSMMUG00000021120 | <i>MAGED1</i>   | -0.80 | 1.83E-04 | MAGE family member D1                                     |
| ENSMMUG00000010189 | <i>TMEM71</i>   | 2.87  | 1.83E-04 | transmembrane protein 71                                  |
| ENSMMUG00000005618 | <i>TNNC1</i>    | -0.79 | 1.83E-04 | troponin C1, slow skeletal and cardiac type               |
| ENSMMUG00000010164 | <i>VGF</i>      | 1.71  | 1.88E-04 | VGF nerve growth factor inducible                         |
| ENSMMUG00000019945 | <i>FGFR3</i>    | -1.18 | 1.95E-04 | fibroblast growth factor receptor 3                       |
| ENSMMUG00000043586 | <i>ID3</i>      | -1.05 | 1.97E-04 | inhibitor of DNA binding 3                                |
| ENSMMUG00000040085 | <i>SLC33A1</i>  | 0.79  | 1.99E-04 | solute carrier family 33 member 1                         |
| ENSMMUG00000003357 | <i>SREBF2</i>   | -0.67 | 2.03E-04 | sterol regulatory element binding transcription factor 2  |
| ENSMMUG00000014072 | <i>IER3</i>     | 0.68  | 2.08E-04 | immediate early response 3                                |
| ENSMMUG00000038454 | <i>H2AFZ</i>    | 0.61  | 2.15E-04 | H2A,Z variant histone 1                                   |
| ENSMMUG00000009247 | <i>OTUD1</i>    | 1.16  | 2.18E-04 | OTU deubiquitinase 1                                      |
| ENSMMUG00000000208 | <i>NRG1</i>     | 1.45  | 2.20E-04 | neuregulin 1                                              |
| ENSMMUG00000012889 | <i>PCYT2</i>    | -0.65 | 2.34E-04 | phosphate cytidylyltransferase 2, ethanolamine            |
| ENSMMUG00000004321 | <i>LAMA3</i>    | -0.90 | 2.37E-04 | laminin subunit alpha 3                                   |
| ENSMMUG00000013290 | <i>LURAP1L</i>  | 1.34  | 2.37E-04 | leucine rich adaptor protein 1 like                       |
| ENSMMUG00000016995 | <i>LUM</i>      | -1.74 | 2.64E-04 | lumican                                                   |
| ENSMMUG00000041372 | <i>CD24</i>     | -1.08 | 2.77E-04 | CD24 molecule                                             |
| ENSMMUG00000006088 | <i>KLF4</i>     | 2.71  | 2.77E-04 | KLF transcription factor 4                                |
| ENSMMUG00000018653 | <i>KRT19</i>    | -0.95 | 3.01E-04 | keratin 19                                                |
| ENSMMUG00000017822 | <i>PPL</i>      | -0.70 | 3.06E-04 | periplakin                                                |
| ENSMMUG00000019514 | <i>UAP1</i>     | 1.23  | 3.06E-04 | UDP-N-acetylglucosamine pyrophosphorylase 1               |
| ENSMMUG00000013865 | <i>WARS</i>     | 0.92  | 3.33E-04 | tryptophanyl-tRNA synthetase                              |
| ENSMMUG00000019849 | <i>BMP2</i>     | 1.34  | 3.37E-04 | bone morphogenetic protein 2                              |
| ENSMMUG00000047534 | <i>ELOVL6</i>   | -1.12 | 3.39E-04 | ELOVL fatty acid elongase 6                               |
| ENSMMUG00000047391 | <i>SRXN1</i>    | 1.41  | 3.47E-04 | sulfiredoxin 1                                            |
| ENSMMUG00000032072 | <i>N/A</i>      | 1.28  | 3.47E-04 | N/A                                                       |
| ENSMMUG00000045219 | <i>CEBPB</i>    | 1.44  | 3.54E-04 | CCAAT enhancer binding protein beta                       |
| ENSMMUG00000013416 | <i>PPP2R2C</i>  | 1.16  | 3.58E-04 | protein phosphatase 2 regulatory subunit Bgamma           |
| ENSMMUG00000029123 | <i>URB1</i>     | 0.88  | 3.61E-04 | URB1 ribosome biogenesis homolog                          |
| ENSMMUG00000010295 | <i>N/A</i>      | 1.12  | 3.61E-04 | N/A                                                       |
| ENSMMUG00000021653 | <i>AARS</i>     | 0.88  | 3.75E-04 | alanyl-tRNA synthetase 1                                  |

|                    |                |       |          |                                                                  |
|--------------------|----------------|-------|----------|------------------------------------------------------------------|
| ENSMMUG00000007593 | <i>PHKA1</i>   | 0.70  | 3.78E-04 | phosphorylase kinase regulatory subunit alpha 1                  |
| ENSMMUG00000018014 | <i>MACO1</i>   | 0.69  | 3.81E-04 | macoilin 1                                                       |
| ENSMMUG00000003744 | <i>SLC44A2</i> | -0.66 | 3.84E-04 | solute carrier family 44 member 2                                |
| ENSMMUG00000040398 | <i>N/A</i>     | 1.34  | 3.87E-04 | N/A                                                              |
| ENSMMUG00000012644 | <i>OSMR</i>    | 0.89  | 4.19E-04 | oncostatin M receptor                                            |
| ENSMMUG00000010662 | <i>SLC16A9</i> | -1.37 | 4.19E-04 | solute carrier family 16 member 9                                |
| ENSMMUG00000001609 | <i>AKAP1</i>   | 0.68  | 4.19E-04 | A-kinase anchoring protein 1                                     |
| ENSMMUG00000021785 | <i>SHMT2</i>   | 0.96  | 4.19E-04 | serine hydroxymethyltransferase 2                                |
| ENSMMUG00000008911 | <i>ALG2</i>    | 0.68  | 4.19E-04 | ALG2 alpha-1,3/1,6-mannosyltransferase                           |
| ENSMMUG00000021286 | <i>COL3A1</i>  | -0.73 | 4.36E-04 | collagen type III alpha 1 chain                                  |
| ENSMMUG00000017215 | <i>TM4SF1</i>  | -0.66 | 4.61E-04 | transmembrane 4 L six family member 1                            |
| ENSMMUG00000016848 | <i>SLCO4A1</i> | 1.00  | 4.81E-04 | solute carrier organic anion transporter family member 4A1       |
| ENSMMUG00000008918 | <i>SRPRB</i>   | 0.82  | 4.86E-04 | SRP receptor subunit beta                                        |
| ENSMMUG00000005875 | <i>LRATD2</i>  | -0.77 | 4.89E-04 | LRAT domain containing 2                                         |
| ENSMMUG00000020707 | <i>LONP1</i>   | 0.65  | 4.89E-04 | lon peptidase 1, mitochondria                                    |
| ENSMMUG00000047109 | <i>HSPA9</i>   | 0.67  | 4.89E-04 | heat shock protein family A (Hsp70) member 9                     |
| ENSMMUG00000040957 | <i>SPSB1</i>   | 1.39  | 4.89E-04 | splA/ryanodine receptor domain and SOCS box containing 1         |
| ENSMMUG00000002052 | <i>N/A</i>     | -0.61 | 4.89E-04 | N/A                                                              |
| ENSMMUG00000009914 | <i>SMAD9</i>   | -0.99 | 4.91E-04 | SMAD family member 9                                             |
| ENSMMUG00000011038 | <i>FZD2</i>    | -0.68 | 4.95E-04 | frizzled class receptor 2                                        |
| ENSMMUG00000016387 | <i>ADM</i>     | 0.87  | 4.96E-04 | adrenomedullin                                                   |
| ENSMMUG00000020558 | <i>STK38</i>   | -0.71 | 4.96E-04 | serine/threonine kinase 38                                       |
| ENSMMUG00000004600 | <i>RCAN1</i>   | 0.89  | 5.67E-04 | regulator of calcineurin 1                                       |
| ENSMMUG00000016294 | <i>SYCP2</i>   | 1.09  | 5.67E-04 | synaptonemal complex protein 2                                   |
| ENSMMUG00000003582 | <i>MXRA8</i>   | -0.69 | 5.92E-04 | matrix remodeling associated 8                                   |
| ENSMMUG00000014818 | <i>MYLK</i>    | -0.78 | 5.92E-04 | myosin light chain kinase                                        |
| ENSMMUG00000003280 | <i>HBEGF</i>   | 0.84  | 5.95E-04 | heparin binding EGF like growth factor                           |
| ENSMMUG00000023265 | <i>AKAP12</i>  | 1.18  | 5.96E-04 | A-kinase anchoring protein 12                                    |
| ENSMMUG00000022163 | <i>SLC1A5</i>  | 1.51  | 6.12E-04 | solute carrier family 1 member 5                                 |
| ENSMMUG00000003585 | <i>ALG5</i>    | 0.69  | 6.75E-04 | ALG5 dolichyl-phosphate beta-glucosyltransferase                 |
| ENSMMUG00000038006 | <i>OTX2</i>    | -0.68 | 7.37E-04 | orthodenticle homeobox 2                                         |
| ENSMMUG00000022481 | <i>CYP1A1</i>  | 2.43  | 8.03E-04 | cytochrome P450 family 1 subfamily A member 1                    |
| ENSMMUG00000004935 | <i>PFKP</i>    | 0.69  | 8.40E-04 | phosphofructokinase, platelet                                    |
| ENSMMUG00000032156 | <i>C3AR1</i>   | 1.27  | 8.49E-04 | complement C3a receptor 1                                        |
| ENSMMUG00000039317 | <i>CREB5</i>   | 1.75  | 8.52E-04 | cAMP responsive element binding protein 5                        |
| ENSMMUG00000020839 | <i>SEPHS2</i>  | 0.94  | 8.52E-04 | selenophosphate synthetase 2                                     |
| ENSMMUG00000019570 | <i>N/A</i>     | -1.12 | 8.59E-04 | N/A                                                              |
| ENSMMUG00000019268 | <i>CD82</i>    | -0.70 | 8.61E-04 | CD82 molecule                                                    |
| ENSMMUG00000008890 | <i>NR1D1</i>   | 1.46  | 8.71E-04 | nuclear receptor subfamily 1 group D member 1                    |
| ENSMMUG00000002933 | <i>GTPBP2</i>  | 1.05  | 8.71E-04 | GTP binding protein 2                                            |
| ENSMMUG00000007428 | <i>GAS6</i>    | -0.68 | 8.80E-04 | growth arrest specific 6                                         |
| ENSMMUG00000006156 | <i>TRPM3</i>   | -0.93 | 9.20E-04 | transient receptor potential cation channel subfamily M member 3 |
| ENSMMUG00000021837 | <i>SARS</i>    | 0.96  | 9.21E-04 | seryl-tRNA synthetase 1                                          |
| ENSMMUG00000008134 | <i>DNAJA3</i>  | 0.69  | 9.64E-04 | DnaJ heat shock protein family (Hsp40) member A3                 |
| ENSMMUG00000016938 | <i>DFNA5</i>   | 0.95  | 9.87E-04 | Non-syndromic hearing impairment protein 5 isoform A             |
| ENSMMUG00000019820 | <i>SH3TC2</i>  | -0.82 | 9.88E-04 | SH3 domain and tetratricopeptide repeats 2                       |
| ENSMMUG00000001819 | <i>LRRC17</i>  | -0.74 | 9.93E-04 | leucine rich repeat containing 17                                |
| ENSMMUG00000012432 | <i>ISG15</i>   | 1.10  | 9.93E-04 | ISG15 ubiquitin like modifier                                    |
| ENSMMUG00000013303 | <i>LRRC4</i>   | -0.98 | 1.05E-03 | leucine rich repeat containing 4                                 |
| ENSMMUG00000015436 | <i>ALDH1A1</i> | -0.70 | 1.05E-03 | aldehyde dehydrogenase 1 family member A1                        |

|                    |                     |       |          |                                                                           |
|--------------------|---------------------|-------|----------|---------------------------------------------------------------------------|
| ENSMMUG00000008334 | <i>GPR1</i>         | -0.78 | 1.05E-03 | chemerin chemokine-like receptor 2                                        |
| ENSMMUG00000017427 | <i>ATP1A3</i>       | 0.98  | 1.10E-03 | ATPase Na <sup>+</sup> /K <sup>+</sup> transporting subunit alpha 3       |
| ENSMMUG00000000664 | <i>RRAS2</i>        | 0.74  | 1.14E-03 | RAS related 2                                                             |
| ENSMMUG00000013059 | <i>GPR180</i>       | 0.88  | 1.21E-03 | G protein-coupled receptor 180                                            |
| ENSMMUG00000019873 | <i>E2F7</i>         | 0.69  | 1.30E-03 | E2F transcription factor 7                                                |
| ENSMMUG00000022846 | <i>ST6GALNAC4</i>   | 0.84  | 1.30E-03 | ST6 N-acetylgalactosaminide alpha-2,6-sialyltransferase 4                 |
| ENSMMUG00000015917 | <i>CYP4B1</i>       | -0.86 | 1.30E-03 | cytochrome P450 family 4 subfamily B member 1                             |
| ENSMMUG00000012672 | <i>MYO10</i>        | -0.53 | 1.32E-03 | myosin X                                                                  |
| ENSMMUG00000001132 | <i>CDKN2B</i>       | -0.74 | 1.33E-03 | cyclin dependent kinase inhibitor 2B                                      |
| ENSMMUG00000015185 | <i>ERN1</i>         | 0.83  | 1.33E-03 | endoplasmic reticulum to nucleus signaling 1                              |
| ENSMMUG00000030891 | <i>HYOU1</i>        | 0.81  | 1.40E-03 | hypoxia up-regulated 1                                                    |
| ENSMMUG00000003896 | <i>TCF4</i>         | -0.68 | 1.42E-03 | transcription factor 4(                                                   |
| ENSMMUG00000030838 | <i>RAVER2</i>       | 0.83  | 1.42E-03 | ribonucleoprotein, PTB binding 2                                          |
| ENSMMUG00000010203 | <i>ARHGAP6</i>      | -0.62 | 1.42E-03 | Rho GTPase activating protein 6                                           |
| ENSMMUG00000018565 | <i>PTPN6</i>        | -0.80 | 1.42E-03 | protein tyrosine phosphatase non-receptor type 6                          |
| ENSMMUG00000012001 | <i>GTF2A1L</i>      | -0.67 | 1.42E-03 | general transcription factor IIA subunit 1 like                           |
| ENSMMUG00000046124 | <i>SLC2A3</i>       | 0.86  | 1.45E-03 | solute carrier family 2 (facilitated glucose transporter), member 3       |
| ENSMMUG00000011277 | <i>MARS</i>         | 0.78  | 1.45E-03 | methionyl-tRNA synthetase 1                                               |
| ENSMMUG00000012737 | <i>PLXND1</i>       | -0.71 | 1.56E-03 | plexin D1                                                                 |
| ENSMMUG00000028737 | <i>FGF21</i>        | 2.60  | 1.64E-03 | fibroblast growth factor 21                                               |
| ENSMMUG00000007831 | <i>HSPD1</i>        | 0.60  | 1.65E-03 | heat shock protein family D (Hsp60) member 1                              |
| ENSMMUG00000010489 | <i>PTH1H</i>        | 2.15  | 1.65E-03 | parathyroid hormone like hormone                                          |
| ENSMMUG00000010531 | <i>ARHGAP1</i>      | -0.57 | 1.65E-03 | Rho GTPase activating protein 1                                           |
| ENSMMUG00000021771 | <i>UBA5</i>         | 0.63  | 1.65E-03 | ubiquitin like modifier activating enzyme 5                               |
| ENSMMUG00000048558 | <i>MXD4</i>         | -0.56 | 1.88E-03 | MAX dimerization protein 4                                                |
| ENSMMUG00000015817 | <i>TMTC1</i>        | -0.74 | 1.89E-03 | transmembrane O-mannosyltransferase targeting cadherins 1                 |
| ENSMMUG00000022921 | <i>SLC2A12</i>      | -0.93 | 1.89E-03 | solute carrier family 2 member 12                                         |
| ENSMMUG00000012223 | <i>BCAT1</i>        | 1.43  | 1.90E-03 | branched chain amino acid transaminase 1                                  |
| ENSMMUG00000012069 | <i>TGFB3</i>        | -0.80 | 1.91E-03 | transforming growth factor beta 3                                         |
| ENSMMUG00000019072 | <i>FAM124A</i>      | -0.79 | 1.92E-03 | family with sequence similarity 124 member A                              |
| ENSMMUG00000001480 | <i>DAAM2</i>        | -0.55 | 1.92E-03 | dishevelled associated activator of morphogenesis 2                       |
| ENSMMUG00000023257 | <i>NFIL3</i>        | 1.55  | 1.96E-03 | nuclear factor, interleukin 3 regulated                                   |
| ENSMMUG00000015370 | <i>PLXDC2</i>       | -0.70 | 2.02E-03 | plexin domain containing 2                                                |
| ENSMMUG00000048779 | <i>CYBRD1</i>       | -0.57 | 2.08E-03 | Cytochrome b reductase 1                                                  |
| ENSMMUG00000046195 | <i>MIS12</i>        | 0.64  | 2.13E-03 | MIS12 kinetochore complex component                                       |
| ENSMMUG00000016399 | <i>RGL1</i>         | -0.73 | 2.13E-03 | ral guanine nucleotide dissociation stimulator like 1                     |
| ENSMMUG00000024570 | <i>LOC114677864</i> | 1.60  | 2.14E-03 | small nucleolar RNA SNORA70                                               |
| ENSMMUG00000041399 | <i>UBAP1L</i>       | 1.38  | 2.16E-03 | ubiquitin associated protein 1 like                                       |
| ENSMMUG00000007273 | <i>DNM3</i>         | -1.42 | 2.21E-03 | dynamitin 3                                                               |
| ENSMMUG00000011719 | <i>SERPINB9</i>     | -0.84 | 2.21E-03 | serpin family B member 9                                                  |
| ENSMMUG00000005670 | <i>RPS6KA2</i>      | 0.95  | 2.22E-03 | ribosomal protein S6 kinase A2                                            |
| ENSMMUG00000048302 | <i>AGFG2</i>        | -0.79 | 2.23E-03 | ArfGAP with FG repeats 2                                                  |
| ENSMMUG00000006855 | <i>TLR4</i>         | 0.96  | 2.31E-03 | toll like receptor 4                                                      |
| ENSMMUG00000009112 | <i>ACOT2</i>        | -0.67 | 2.31E-03 | acyl-CoA thioesterase 2                                                   |
| ENSMMUG00000039441 | <i>MAB21L2</i>      | -0.67 | 2.35E-03 | mab-21 like 2                                                             |
| ENSMMUG00000009063 | <i>ETS2</i>         | 1.01  | 2.36E-03 | ETS proto-oncogene 2, transcription factor                                |
| ENSMMUG00000009097 | <i>MMP11</i>        | -0.77 | 2.37E-03 | matrix metalloproteinase 11                                               |
| ENSMMUG00000017638 | <i>EMP1</i>         | 0.75  | 2.44E-03 | epithelial membrane protein 1                                             |
| ENSMMUG00000022581 | <i>KCNMB1</i>       | -0.69 | 2.44E-03 | potassium calcium-activated channel subfamily M regulatory beta subunit 1 |
| ENSMMUG00000042787 | <i>N/A</i>          | 2.35  | 2.51E-03 | N/A                                                                       |

|                    |                     |       |          |                                                            |
|--------------------|---------------------|-------|----------|------------------------------------------------------------|
| ENSMMUG00000013797 | <i>GFPT1</i>        | 0.91  | 2.52E-03 | glutamine--fructose-6-phosphate transaminase 1             |
| ENSMMUG00000018116 | <i>JAG1</i>         | 1.32  | 2.55E-03 | jagged canonical Notch ligand 1                            |
| ENSMMUG00000017631 | <i>GPRC5A</i>       | 0.87  | 2.61E-03 | G protein-coupled receptor class C group 5 member A        |
| ENSMMUG00000010981 | <i>SLC2A6</i>       | -0.94 | 2.65E-03 | solute carrier family 2 member 6                           |
| ENSMMUG00000000265 | <i>ADAMTS9</i>      | 1.41  | 2.67E-03 | ADAM metalloproteinase with thrombospondin type 1 motif 9  |
| ENSMMUG00000016666 | <i>CHRD1</i>        | -0.63 | 2.67E-03 | chordin like 1                                             |
| ENSMMUG00000045506 | <i>MAFF</i>         | 1.47  | 2.67E-03 | MAF bZIP transcription factor F                            |
| ENSMMUG00000005994 | <i>ST6GALNAC5</i>   | -0.86 | 2.70E-03 | ST6 N-acetylgalactosaminide alpha-2,6-sialyltransferase 5  |
| ENSMMUG00000014219 | <i>OSGIN1</i>       | 1.76  | 2.70E-03 | oxidative stress induced growth inhibitor 1                |
| ENSMMUG00000019083 | <i>TFAP4</i>        | 0.74  | 2.74E-03 | transcription factor AP-4                                  |
| ENSMMUG00000044729 | <i>SLC9B2</i>       | 0.65  | 2.74E-03 | solute carrier family 9 member B2                          |
| ENSMMUG00000031439 | <i>FBXL2</i>        | -0.63 | 2.80E-03 | F-box and leucine rich repeat protein 2                    |
| ENSMMUG00000006187 | <i>ANGPTL7</i>      | -0.66 | 2.82E-03 | angiopoietin like 7                                        |
| ENSMMUG00000009831 | <i>TBC1D2</i>       | -0.64 | 2.82E-03 | TBC1 domain family member 2                                |
| ENSMMUG00000002517 | <i>PTPDC1</i>       | 2.44  | 2.85E-03 | protein tyrosine phosphatase domain containing 1           |
| ENSMMUG00000009251 | <i>TSPAN9</i>       | -0.67 | 2.86E-03 | tetraspanin 9                                              |
| ENSMMUG00000023274 | <i>SULF1</i>        | -0.83 | 2.88E-03 | sulfatase 1                                                |
| ENSMMUG00000009366 | <i>DOCK2</i>        | -0.54 | 2.92E-03 | dedicator of cytokinesis 2                                 |
| ENSMMUG00000005136 | <i>TCAF1</i>        | -0.62 | 2.95E-03 | TRPM8 channel associated factor 1                          |
| ENSMMUG00000000511 | <i>MSC</i>          | 1.14  | 3.05E-03 | musculin                                                   |
| ENSMMUG00000013531 | <i>IPO5</i>         | 0.56  | 3.05E-03 | importin 5                                                 |
| ENSMMUG00000000947 | <i>TEX30</i>        | 0.70  | 3.05E-03 | testis expressed 30                                        |
| ENSMMUG00000000345 | <i>CARS</i>         | 0.92  | 3.05E-03 | cysteinyI-tRNA synthetase 1                                |
| ENSMMUG00000022066 | <i>UTP25</i>        | 0.63  | 3.05E-03 | UTP25 small subunit processor component                    |
| ENSMMUG00000019126 | <i>PNP</i>          | 0.77  | 3.08E-03 | purine nucleoside phosphorylase                            |
| ENSMMUG00000007284 | <i>SUN2</i>         | -0.57 | 3.09E-03 | Sad1 and UNC84 domain containing 2                         |
| ENSMMUG00000011328 | <i>CPEB1</i>        | 0.65  | 3.10E-03 | cytoplasmic polyadenylation element binding protein 1      |
| ENSMMUG00000003301 | <i>TEF</i>          | -0.75 | 3.22E-03 | TEF transcription factor, PAR bZIP family member           |
| ENSMMUG00000020954 | <i>CDC25A</i>       | 0.69  | 3.22E-03 | cell division cycle 25A                                    |
| ENSMMUG00000005221 | <i>ADAMTS15</i>     | 0.89  | 3.22E-03 | ADAM metalloproteinase with thrombospondin type 1 motif 15 |
| ENSMMUG00000023810 | <i>MARS2</i>        | 0.97  | 3.22E-03 | methionyl-tRNA synthetase 2, mitochondrial                 |
| ENSMMUG00000004475 | <i>MMP2</i>         | -0.59 | 3.22E-03 | matrix metalloproteinase 2                                 |
| ENSMMUG00000023042 | <i>SPCS2</i>        | 0.61  | 3.35E-03 | signal peptidase complex subunit 2                         |
| ENSMMUG00000010685 | <i>OLFML2B</i>      | -0.92 | 3.35E-03 | olfactomedin like 2B                                       |
| ENSMMUG00000039960 | <i>LOC106998872</i> | 1.82  | 3.42E-03 | N/A                                                        |
| ENSMMUG00000013048 | <i>NPR3</i>         | -1.39 | 3.58E-03 | natriuretic peptide receptor 3                             |
| ENSMMUG00000013366 | <i>JUP</i>          | -0.80 | 3.58E-03 | junction plakoglobin                                       |
| ENSMMUG00000007906 | <i>CDC42EP3</i>     | 0.60  | 3.63E-03 | CDC42 effector protein 3                                   |
| ENSMMUG00000001583 | <i>FSCN2</i>        | -0.94 | 3.63E-03 | fascin actin-bundling protein 2, retinal                   |
| ENSMMUG00000022963 | <i>SLC25A38</i>     | 0.71  | 3.65E-03 | solute carrier family 25 member 38                         |
| ENSMMUG00000001850 | <i>SPARC</i>        | -0.60 | 3.81E-03 | secreted protein acidic and cysteine rich                  |
| ENSMMUG00000005915 | <i>DYNC1I1</i>      | -0.71 | 3.83E-03 | dynein cytoplasmic 1 intermediate chain 1                  |
| ENSMMUG00000011798 | <i>LOC705696</i>    | 0.58  | 3.96E-03 | eukaryotic translation initiation factor 3 subunit C       |
| ENSMMUG00000021590 | <i>PCK2</i>         | 0.94  | 3.96E-03 | phosphoenolpyruvate carboxykinase 2, mitochondrial         |
| ENSMMUG00000021074 | <i>RASGEF1B</i>     | 1.55  | 3.97E-03 | RasGEF domain family member 1B                             |
| ENSMMUG00000048864 | <i>ROGDI</i>        | -0.64 | 4.06E-03 | rogdi atypical leucine zipper                              |
| ENSMMUG00000017946 | <i>RND1</i>         | 2.49  | 4.06E-03 | Rho family GTPase 1                                        |
| ENSMMUG00000021296 | <i>EML6</i>         | 0.79  | 4.08E-03 | EMAP like 6                                                |

|                    |                 |       |          |                                                             |
|--------------------|-----------------|-------|----------|-------------------------------------------------------------|
| ENSMMUG00000014175 | <i>SPRY4</i>    | 1.38  | 4.10E-03 | sprouty RTK signaling antagonist 4                          |
| ENSMMUG00000023393 | <i>LYAR</i>     | 0.65  | 4.24E-03 | Ly1 antibody reactive                                       |
| ENSMMUG00000015799 | <i>TLL1</i>     | -0.66 | 4.27E-03 | tolloid like 1                                              |
| ENSMMUG00000046090 | <i>ZNF488</i>   | -0.74 | 4.33E-03 | zinc finger protein 488                                     |
| ENSMMUG00000011907 | <i>RF02251</i>  | -0.86 | 4.33E-03 | N/A                                                         |
| ENSMMUG00000011294 | <i>LSR</i>      | 0.62  | 4.34E-03 | lipolysis stimulated lipoprotein receptor                   |
| ENSMMUG00000048483 | <i>RF00015</i>  | 1.59  | 4.50E-03 | RNA, U4 small nuclear 2                                     |
| ENSMMUG00000009901 | <i>LDLR</i>     | -0.80 | 4.65E-03 | low density lipoprotein receptor                            |
| ENSMMUG00000003237 | <i>ID2</i>      | -0.70 | 4.65E-03 | inhibitor of DNA binding 2                                  |
| ENSMMUG00000003611 | <i>HMOX2</i>    | 0.78  | 4.65E-03 | heme oxygenase 2                                            |
| ENSMMUG00000002295 | <i>CRABP2</i>   | 1.45  | 4.69E-03 | cellular retinoic acid binding protein 2                    |
| ENSMMUG00000002182 | <i>PISD</i>     | 0.61  | 4.73E-03 | phosphatidylserine decarboxylase                            |
| ENSMMUG00000003511 | <i>CLIC5</i>    | -1.08 | 4.79E-03 | chloride intracellular channel 5                            |
| ENSMMUG00000008924 | <i>PLLP</i>     | -0.87 | 4.93E-03 | plasmolipin                                                 |
| ENSMMUG00000012427 | <i>FBXL13</i>   | -0.64 | 5.04E-03 | F-box and leucine rich repeat protein 13                    |
| ENSMMUG00000014757 | <i>SYT17</i>    | -0.67 | 5.10E-03 | synaptotagmin 17                                            |
| ENSMMUG00000004179 | <i>LIMS2</i>    | -1.20 | 5.11E-03 | LIM zinc finger domain containing 2                         |
| ENSMMUG00000015785 | <i>AMPD3</i>    | 0.78  | 5.17E-03 | adenosine monophosphate deaminase 3                         |
| ENSMMUG00000039576 | N/A             | 0.97  | 5.35E-03 | N/A                                                         |
| ENSMMUG00000014784 | <i>DSP</i>      | -0.57 | 5.38E-03 | desmoplakin                                                 |
| ENSMMUG00000045851 | N/A             | 0.93  | 5.42E-03 | N/A                                                         |
| ENSMMUG00000007231 | <i>ZSCAN31</i>  | -0.76 | 5.49E-03 | zinc finger and SCAN domain containing 31                   |
| ENSMMUG00000011999 | <i>SLC38A1</i>  | 0.83  | 5.49E-03 | solute carrier family 38 member 1                           |
| ENSMMUG00000001952 | <i>SRGAP1</i>   | 1.40  | 5.88E-03 | SLIT-ROBO Rho GTPase activating protein 1                   |
| ENSMMUG00000018791 | <i>MOCOS</i>    | 0.78  | 5.93E-03 | molybdenum cofactor sulfurase                               |
| ENSMMUG00000012068 | <i>SIPA1L2</i>  | 2.01  | 6.09E-03 | signal induced proliferation associated 1 like 2            |
| ENSMMUG00000020987 | <i>FABP3</i>    | -0.52 | 6.22E-03 | fatty acid binding protein 4                                |
| ENSMMUG00000005093 | <i>KLHL32</i>   | -0.81 | 6.32E-03 | kelch like family member 32                                 |
| ENSMMUG00000018880 | <i>ABHD17B</i>  | -0.83 | 6.69E-03 | abhydrolase domain containing 17B, depalmitoylase           |
| ENSMMUG00000001183 | <i>NOLC1</i>    | 0.50  | 6.73E-03 | nucleolar and coiled-body phosphoprotein 1                  |
| ENSMMUG00000013808 | <i>SH3BP4</i>   | 0.62  | 6.82E-03 | SH3 domain binding protein 4                                |
| ENSMMUG00000012634 | <i>GTF2F2</i>   | 0.57  | 6.92E-03 | general transcription factor IIF subunit 2                  |
| ENSMMUG00000006057 | <i>NTMT1</i>    | 0.55  | 6.95E-03 | N-terminal Xaa-Pro-Lys N-methyltransferase 1                |
| ENSMMUG00000008003 | <i>LRRC8C</i>   | 0.80  | 6.99E-03 | leucine rich repeat containing 8 VRAC subunit C             |
| ENSMMUG00000008653 | <i>FOSL1</i>    | 0.74  | 7.04E-03 | FOS like 1, AP-1 transcription factor subunit               |
| ENSMMUG00000000145 | <i>PDPN</i>     | -0.58 | 7.13E-03 | podoplanin                                                  |
| ENSMMUG00000005722 | <i>PDCD4</i>    | -0.78 | 7.27E-03 | programmed cell death 4                                     |
| ENSMMUG00000001996 | <i>F11R</i>     | -0.74 | 7.27E-03 | F11 receptor                                                |
| ENSMMUG00000017204 | <i>ADGRE5</i>   | -0.53 | 7.27E-03 | adhesion G protein-coupled receptor E5                      |
| ENSMMUG00000004496 | <i>MIEF1</i>    | 0.55  | 7.30E-03 | mitochondrial elongation factor 1                           |
| ENSMMUG00000016040 | <i>RND3</i>     | 0.70  | 7.34E-03 | Rho family GTPase 3                                         |
| ENSMMUG00000010114 | <i>TMEM63A</i>  | -0.51 | 7.37E-03 | transmembrane protein 63A                                   |
| ENSMMUG00000005785 | <i>RIN2</i>     | -0.61 | 7.37E-03 | Ras and Rab interactor 2                                    |
| ENSMMUG00000045396 | <i>SELENBP1</i> | -0.60 | 7.63E-03 | selenium binding protein 1                                  |
| ENSMMUG00000021247 | <i>TGM2</i>     | -0.77 | 7.70E-03 | transglutaminase 2                                          |
| ENSMMUG00000018925 | <i>ALS2CL</i>   | -0.60 | 7.70E-03 | ALS2 C-terminal like                                        |
| ENSMMUG00000013640 | <i>ZBTB43</i>   | 0.68  | 7.72E-03 | zinc finger and BTB domain containing 43                    |
| ENSMMUG00000007401 | <i>ARRDC2</i>   | -0.59 | 7.73E-03 | arrestin domain containing 2                                |
| ENSMMUG00000022019 | <i>CTSO</i>     | -0.49 | 7.74E-03 | cathepsin O                                                 |
| ENSMMUG00000014372 | <i>BMF</i>      | -0.74 | 7.92E-03 | Bcl2 modifying factor                                       |
| ENSMMUG00000007729 | <i>ILVBL</i>    | -0.52 | 7.92E-03 | ilvB acetolactate synthase like                             |
| ENSMMUG00000023491 | <i>LGR4</i>     | -0.70 | 8.09E-03 | leucine rich repeat containing G protein-coupled receptor 4 |
| ENSMMUG00000008100 | <i>SLC6A3</i>   | -0.58 | 8.35E-03 | solute carrier family 6 member 3                            |

|                    |                     |       |          |                                                                  |
|--------------------|---------------------|-------|----------|------------------------------------------------------------------|
| ENSMMUG00000005198 | <i>IRF1</i>         | 0.67  | 8.35E-03 | interferon regulatory factor 1                                   |
| ENSMMUG00000010808 | <i>PREB</i>         | 0.63  | 8.42E-03 | prolactin regulatory element binding                             |
| ENSMMUG00000002390 | <i>C1H1orf43</i>    | 0.53  | 8.42E-03 | chromosome 1 C1orf43 homolog                                     |
| ENSMMUG00000017300 | <i>PFDN4</i>        | 0.54  | 8.43E-03 | prefoldin subunit 4                                              |
| ENSMMUG00000002640 | <i>TRPC4</i>        | -0.86 | 8.48E-03 | transient receptor potential cation channel subfamily C member 4 |
| ENSMMUG00000003974 | <i>EBNA1BP2</i>     | 0.50  | 8.48E-03 | EBNA1 binding protein 2                                          |
| ENSMMUG00000013997 | <i>GREB1L</i>       | -0.68 | 8.48E-03 | GREB1 like retinoic acid receptor coactivator                    |
| ENSMMUG00000019270 | <i>LOC712661</i>    | 0.84  | 8.48E-03 | perilipin-2                                                      |
| ENSMMUG00000022873 | <i>MTO1</i>         | 0.54  | 8.48E-03 | mitochondrial tRNA translation optimization 1                    |
| ENSMMUG00000030786 | <i>SERPINB8</i>     | 0.94  | 8.48E-03 | serpin family B member 8                                         |
| ENSMMUG00000015607 | <i>SLC39A13</i>     | -0.46 | 8.52E-03 | solute carrier family 39 member 13                               |
| ENSMMUG00000011557 | <i>PDGFRB</i>       | -0.66 | 8.55E-03 | platelet derived growth factor receptor beta                     |
| ENSMMUG00000021484 | <i>NPC1</i>         | -0.49 | 8.63E-03 | NPC intracellular cholesterol transporter 1                      |
| ENSMMUG00000001847 | <i>GBP6</i>         | 1.38  | 8.71E-03 | guanylate binding protein family member 6                        |
| ENSMMUG00000020157 | <i>CNTN4</i>        | 2.55  | 8.71E-03 | contactin 4                                                      |
| ENSMMUG00000042891 | <i>QPRT</i>         | -0.87 | 8.71E-03 | quinolinate phosphoribosyltransferase                            |
| ENSMMUG00000023621 | <i>DDX27</i>        | 0.54  | 9.13E-03 | DEAD-box helicase 27                                             |
| ENSMMUG00000003587 | <i>KLRC1</i>        | 1.97  | 9.20E-03 | killer cell lectin like receptor C1                              |
| ENSMMUG00000024424 | <i>LOC114679145</i> | 2.38  | 9.30E-03 | small nucleolar RNA SNORD63                                      |
| ENSMMUG00000044591 | <i>N/A</i>          | -0.72 | 9.62E-03 | N/A                                                              |
| ENSMMUG00000003708 | <i>PDE7B</i>        | 0.93  | 9.92E-03 | phosphodiesterase 7B                                             |
| ENSMMUG00000004383 | <i>ADGRF3</i>       | -0.64 | 9.95E-03 | adhesion G protein-coupled receptor F3                           |
| ENSMMUG00000022750 | <i>ID1</i>          | -0.77 | 9.97E-03 | inhibitor of DNA binding 1                                       |
| ENSMMUG00000004403 | <i>ZBTB21</i>       | 0.75  | 9.97E-03 | zinc finger and BTB domain containing 21                         |
| ENSMMUG00000018053 | <i>DPP7</i>         | -0.45 | 9.97E-03 | dipeptidyl peptidase 7                                           |
| ENSMMUG00000008633 | <i>ANK2</i>         | -0.56 | 1.01E-02 | ankyrin 2                                                        |
| ENSMMUG00000015968 | <i>FKBP4</i>        | 0.57  | 1.01E-02 | FKBP prolyl isomerase 4                                          |
| ENSMMUG00000007405 | <i>CMPK2</i>        | 1.17  | 1.01E-02 | cytidine/uridine monophosphate kinase 2                          |
| ENSMMUG00000048768 | <i>N/A</i>          | -0.64 | 1.01E-02 | N/A                                                              |
| ENSMMUG00000004751 | <i>PLA2G15</i>      | -0.67 | 1.01E-02 | phospholipase A2 group XV                                        |
| ENSMMUG00000014685 | <i>PDK2</i>         | -0.53 | 1.01E-02 | pyruvate dehydrogenase kinase 2                                  |
| ENSMMUG00000010147 | <i>ALDH4A1</i>      | -0.65 | 1.01E-02 | aldehyde dehydrogenase 4 family member A1                        |
| ENSMMUG00000003316 | <i>MAN2A1</i>       | 0.62  | 1.05E-02 | mannosidase alpha class 2A member 1                              |
| ENSMMUG00000041440 | <i>N/A</i>          | 1.25  | 1.05E-02 | N/A                                                              |
| ENSMMUG00000012569 | <i>TMEM132D</i>     | 0.65  | 1.05E-02 | transmembrane protein 132D                                       |
| ENSMMUG00000039045 | <i>NGF</i>          | 0.60  | 1.05E-02 | nerve growth factor                                              |
| ENSMMUG00000013342 | <i>HPSE</i>         | 0.68  | 1.05E-02 | heparanase                                                       |
| ENSMMUG00000004196 | <i>MGARP</i>        | -1.06 | 1.07E-02 | mitochondria localized glutamic acid rich protein                |
| ENSMMUG00000019661 | <i>TPST2</i>        | -0.51 | 1.08E-02 | tyrosylprotein sulfotransferase 2                                |
| ENSMMUG00000023450 | <i>PIK3IP1</i>      | -0.84 | 1.08E-02 | phosphoinositide-3-kinase interacting protein 1                  |
| ENSMMUG00000017017 | <i>FYN</i>          | 0.65  | 1.08E-02 | FYN proto-oncogene, Src family tyrosine kinase                   |
| ENSMMUG00000008793 | <i>SPP1</i>         | -0.67 | 1.08E-02 | secreted phosphoprotein 1                                        |
| ENSMMUG00000014230 | <i>FMO4</i>         | -0.55 | 1.10E-02 | flavin containing dimethylaniline monooxygenase 4                |
| ENSMMUG00000012138 | <i>RORC</i>         | -0.49 | 1.11E-02 | RAR related orphan receptor C                                    |
| ENSMMUG00000001127 | <i>TIMP4</i>        | 1.43  | 1.11E-02 | TIMP metalloproteinase inhibitor 4                               |
| ENSMMUG00000023533 | <i>SERINC5</i>      | -0.51 | 1.12E-02 | serine incorporator 5                                            |
| ENSMMUG00000010814 | <i>TRIB3</i>        | 1.55  | 1.13E-02 | tribbles pseudokinase 3                                          |
| ENSMMUG00000012600 | <i>HAX1</i>         | 0.62  | 1.13E-02 | HCLS1 associated protein X-1                                     |
| ENSMMUG00000005788 | <i>LOC693799</i>    | 1.15  | 1.14E-02 | mitochondrial import inner membrane translocase subunit Tim9     |
| ENSMMUG00000023365 | <i>ME1</i>          | -0.53 | 1.15E-02 | malic enzyme 1                                                   |
| ENSMMUG00000012592 | <i>UROS</i>         | -0.51 | 1.15E-02 | uroporphyrinogen III synthase                                    |
| ENSMMUG00000021407 | <i>LOC706619</i>    | -0.51 | 1.15E-02 | transducin-like enhancer protein 4                               |



|                    |                  |       |          |                                                        |
|--------------------|------------------|-------|----------|--------------------------------------------------------|
| ENSMMUG00000008539 | <i>TRAF4</i>     | -0.50 | 1.15E-02 | TNF receptor associated factor 4                       |
| ENSMMUG00000008033 | <i>IFRD1</i>     | 0.98  | 1.21E-02 | interferon related developmental regulator 1           |
| ENSMMUG00000002357 | <i>TMEM2</i>     | -0.53 | 1.21E-02 | cell migration inducing hyaluronidase 2                |
| ENSMMUG00000022403 | <i>LRRC32</i>    | -0.84 | 1.21E-02 | leucine rich repeat containing 32                      |
| ENSMMUG00000010279 | <i>SLC1A4</i>    | 0.65  | 1.21E-02 | solute carrier family 1 member 4                       |
| ENSMMUG00000046776 | N/A              | -1.19 | 1.21E-02 | N/A                                                    |
| ENSMMUG00000047621 | <i>TM4SF18</i>   | -0.99 | 1.23E-02 | transmembrane 4 L six family member 18                 |
| ENSMMUG00000021225 | <i>SAT1</i>      | 0.96  | 1.24E-02 | spermidine/spermine N1-acetyltransferase 1             |
| ENSMMUG00000010813 | <i>GAR1</i>      | 0.85  | 1.24E-02 | GAR1 ribonucleoprotein                                 |
| ENSMMUG00000015329 | <i>GTPBP4</i>    | 0.55  | 1.24E-02 | GTP binding protein 4                                  |
| ENSMMUG00000008335 | <i>MX1</i>       | 1.73  | 1.24E-02 | MX dynamin like GTPase 1                               |
| ENSMMUG00000029011 | <i>UBXN8</i>     | 0.56  | 1.24E-02 | UBX domain protein 8                                   |
| ENSMMUG00000040972 | <i>KCNK3</i>     | -1.01 | 1.24E-02 | potassium two pore domain channel subfamily K member 3 |
| ENSMMUG00000044029 | <i>C1QTNF6</i>   | -0.76 | 1.25E-02 | C1q and TNF related 6                                  |
| ENSMMUG00000016418 | <i>CBX4</i>      | 0.62  | 1.25E-02 | chromobox 4                                            |
| ENSMMUG00000021764 | <i>MMP10</i>     | 1.54  | 1.27E-02 | matrix metalloproteinase 10                            |
| ENSMMUG00000012895 | <i>PYCR1</i>     | 0.82  | 1.28E-02 | pyrroline-5-carboxylate reductase 1                    |
| ENSMMUG00000005431 | <i>SLC25A1</i>   | -0.48 | 1.29E-02 | solute carrier family 25 member 1                      |
| ENSMMUG00000007052 | <i>MMP15</i>     | 0.87  | 1.31E-02 | matrix metalloproteinase 15                            |
| ENSMMUG00000011161 | <i>STXBP5L</i>   | -0.61 | 1.35E-02 | syntaxin binding protein 5L                            |
| ENSMMUG00000041731 | <i>TMEM86A</i>   | -0.46 | 1.37E-02 | transmembrane protein 86A                              |
| ENSMMUG00000002038 | <i>ST3GAL1</i>   | 0.74  | 1.38E-02 | ST3 beta-galactoside alpha-2,3-sialyltransferase 1     |
| ENSMMUG00000012531 | <i>CEMIP</i>     | -0.75 | 1.38E-02 | cell migration inducing hyaluronidase 1                |
| ENSMMUG00000014498 | <i>CACNA1E</i>   | 1.06  | 1.38E-02 | calcium voltage-gated channel subunit alpha1 E         |
| ENSMMUG00000015158 | <i>SLC6A9</i>    | 1.46  | 1.39E-02 | solute carrier family 6 member 9                       |
| ENSMMUG00000000828 | <i>GAB1</i>      | -0.60 | 1.45E-02 | GRB2 associated binding protein 1                      |
| ENSMMUG00000010594 | <i>PTGFR</i>     | 1.36  | 1.45E-02 | prostaglandin F receptor                               |
| ENSMMUG00000003189 | <i>PPIF</i>      | 0.75  | 1.46E-02 | peptidylprolyl isomerase F                             |
| ENSMMUG00000044497 | N/A              | 1.07  | 1.46E-02 | N/A                                                    |
| ENSMMUG00000019850 | <i>SLC47A1</i>   | 0.61  | 1.48E-02 | solute carrier family 47 member 1                      |
| ENSMMUG00000002700 | <i>ALOXE3</i>    | 1.79  | 1.48E-02 | arachidonate lipoxygenase 3                            |
| ENSMMUG00000003289 | <i>ITGB3</i>     | 1.16  | 1.48E-02 | integrin subunit beta 3                                |
| ENSMMUG00000019859 | <i>PRKG2</i>     | -1.22 | 1.48E-02 | protein kinase cGMP-dependent 2                        |
| ENSMMUG00000020408 | <i>HPGD</i>      | -0.89 | 1.49E-02 | 15-hydroxyprostaglandin dehydrogenase                  |
| ENSMMUG00000014618 | <i>SEC23B</i>    | 0.51  | 1.49E-02 | SEC23 homolog B, COPII coat complex component          |
| ENSMMUG00000012878 | <i>SPATA9</i>    | 2.43  | 1.49E-02 | spermatogenesis associated 9                           |
| ENSMMUG00000001213 | <i>NDRG4</i>     | 0.49  | 1.49E-02 | NDRG family member 4                                   |
| ENSMMUG00000004872 | <i>TMEM220</i>   | -0.72 | 1.49E-02 | transmembrane protein 220                              |
| ENSMMUG00000008869 | <i>TNFAIP3</i>   | 0.89  | 1.49E-02 | TNF alpha induced protein 3                            |
| ENSMMUG00000004594 | <i>CGRF1</i>     | 0.56  | 1.51E-02 | cell growth regulator with ring finger domain 1        |
| ENSMMUG00000020941 | <i>LOC693438</i> | 0.89  | 1.52E-02 | heat shock 60kDa protein 1 (chaperonin)-like           |
| ENSMMUG00000022927 | <i>RCAN3</i>     | -0.67 | 1.53E-02 | RCAN family member 3                                   |
| ENSMMUG00000002678 | <i>ITGB6</i>     | -1.17 | 1.55E-02 | integrin subunit beta 6                                |
| ENSMMUG00000010393 | <i>RAC1</i>      | -0.58 | 1.55E-02 | Rac family small GTPase 1                              |
| ENSMMUG00000010895 | <i>CDH3</i>      | -0.68 | 1.55E-02 | cadherin 3                                             |
| ENSMMUG00000047800 | <i>PFKFB3</i>    | 0.64  | 1.55E-02 | 6-phosphofructo-2-kinase/fructose-2,6-bisphosphatase 3 |
| ENSMMUG00000011115 | <i>TYR</i>       | -0.60 | 1.55E-02 | tyrosinase                                             |
| ENSMMUG00000041795 | <i>CROCC2</i>    | -1.11 | 1.55E-02 | ciliary rootlet coiled-coil, rootletin family member 2 |
| ENSMMUG00000001005 | <i>DDX21</i>     | 0.51  | 1.55E-02 | DEAD-box helicase 21                                   |
| ENSMMUG00000009429 | <i>FAM102B</i>   | -0.74 | 1.56E-02 | EEIG family member 2                                   |
| ENSMMUG00000000529 | <i>GPC6</i>      | -0.67 | 1.61E-02 | glypican 6                                             |
| ENSMMUG00000016030 | <i>TRIM25</i>    | 0.62  | 1.61E-02 | tripartite motif containing 25                         |

|                     |                     |       |          |                                                              |
|---------------------|---------------------|-------|----------|--------------------------------------------------------------|
| ENSMMUG00000005790  | <i>KLHL29</i>       | 0.55  | 1.61E-02 | kelch like family member 29                                  |
| ENSMMUG00000009238  | <i>IL1RL1</i>       | 2.29  | 1.66E-02 | interleukin 1 receptor like 1                                |
| ENSMMUG00000001694  | <i>FZD8</i>         | -0.59 | 1.67E-02 | frizzled class receptor 8                                    |
| ENSMMUG00000007798  | <i>CLMP</i>         | 1.05  | 1.68E-02 | CXADR like membrane protein                                  |
| ENSMMUG00000009528  | <i>THSD1</i>        | 0.89  | 1.71E-02 | thrombospondin type 1 domain containing                      |
| ENSMMUG00000006284  | <i>MBOAT2</i>       | -0.54 | 1.71E-02 | membrane bound O-acyltransferase domain contain-<br>ing 2    |
| ENSMMUG000000021037 | <i>AK2</i>          | 0.54  | 1.71E-02 | adenylate kinase 2                                           |
| ENSMMUG00000002103  | <i>DNER</i>         | 1.67  | 1.73E-02 | delta/notch like EGF repeat containing                       |
| ENSMMUG00000003839  | <i>MAPKBP1</i>      | -0.48 | 1.74E-02 | mitogen-activated protein kinase binding protein 1           |
| ENSMMUG00000020086  | <i>POR</i>          | 0.57  | 1.75E-02 | cytochrome p450 oxidoreductase                               |
| ENSMMUG000000031911 | <i>KRT18</i>        | 0.52  | 1.76E-02 | keratin 18                                                   |
| ENSMMUG00000000343  | <i>SCN3B</i>        | 2.30  | 1.76E-02 | sodium voltage-gated channel beta subunit 3                  |
| ENSMMUG000000012100 | <i>MYOM1</i>        | -0.68 | 1.77E-02 | myomesin 1                                                   |
| ENSMMUG000000019892 | <i>CDH15</i>        | -1.06 | 1.77E-02 | cadherin 15                                                  |
| ENSMMUG000000040286 | <i>NAPEPLD</i>      | -0.55 | 1.77E-02 | N-acyl phosphatidylethanolamine phospholipase D              |
| ENSMMUG000000004236 | <i>N/A</i>          | -0.89 | 1.77E-02 | N/A                                                          |
| ENSMMUG000000042378 | <i>PEAK1</i>        | -0.53 | 1.79E-02 | pseudopodium enriched atypical kinase 1                      |
| ENSMMUG000000018572 | <i>GHITM</i>        | 0.53  | 1.82E-02 | growth hormone inducible transmembrane protein               |
| ENSMMUG000000040044 | <i>SEMA3A</i>       | -0.90 | 1.82E-02 | semaphorin 3A                                                |
| ENSMMUG00000007555  | <i>RF00056</i>      | 1.43  | 1.82E-02 | N/A                                                          |
| ENSMMUG000000020374 | <i>NFKBIA</i>       | 0.55  | 1.83E-02 | NFKB inhibitor alpha                                         |
| ENSMMUG000000016840 | <i>SOWAHC</i>       | 0.90  | 1.83E-02 | sosondowah ankyrin repeat domain family member<br>C          |
| ENSMMUG000000017179 | <i>MAP2K1</i>       | 0.46  | 1.83E-02 | mitogen-activated protein kinase kinase 1                    |
| ENSMMUG000000000980 | <i>YPEL3</i>        | -0.50 | 1.83E-02 | yippee like 3                                                |
| ENSMMUG000000005220 | <i>SYNM</i>         | -0.58 | 1.87E-02 | synemin                                                      |
| ENSMMUG000000017588 | <i>NRP1</i>         | -0.51 | 1.87E-02 | neuropilin 1                                                 |
| ENSMMUG000000043224 | <i>PRRX1</i>        | -0.52 | 1.89E-02 | paired related homeobox 1                                    |
| ENSMMUG000000017101 | <i>CTPS1</i>        | 0.49  | 1.91E-02 | CTP synthase 1                                               |
| ENSMMUG000000014992 | <i>RAB2B</i>        | 0.45  | 1.91E-02 | RAB2B, member RAS oncogene family                            |
| ENSMMUG000000020365 | <i>ARHGAP18</i>     | -0.62 | 1.91E-02 | Rho GTPase activating protein 18                             |
| ENSMMUG000000043719 | <i>C1H1orf216</i>   | -0.60 | 1.91E-02 | chromosome 1 open reading frame                              |
| ENSMMUG000000011902 | <i>OSTC</i>         | 0.55  | 1.92E-02 | oligosaccharyltransferase complex non-catalytic sub-<br>unit |
| ENSMMUG000000007814 | <i>GPM6A</i>        | -0.54 | 1.92E-02 | glycoprotein M6A                                             |
| ENSMMUG000000012848 | <i>XPR1</i>         | -0.51 | 1.93E-02 | xenotropic and polytropic retrovirus receptor 1              |
| ENSMMUG000000015676 | <i>CDSN</i>         | -1.36 | 1.94E-02 | corneodesmosin                                               |
| ENSMMUG000000024764 | <i>LOC114680488</i> | 0.81  | 1.96E-02 | small nucleolar RNA SNORA72                                  |
| ENSMMUG000000018411 | <i>INSL4</i>        | -0.94 | 1.97E-02 | insulin like 4                                               |
| ENSMMUG000000002614 | <i>SLIT2</i>        | 1.13  | 1.97E-02 | slit guidance ligand 2                                       |
| ENSMMUG000000003721 | <i>KLF15</i>        | 1.03  | 1.97E-02 | KLF transcription factor 15                                  |
| ENSMMUG000000015303 | <i>ABCA7</i>        | -0.51 | 1.98E-02 | ATP binding cassette subfamily A member 7                    |
| ENSMMUG000000045968 | <i>N/A</i>          | 0.71  | 1.98E-02 | N/A                                                          |
| ENSMMUG000000044239 | <i>H3F3A</i>        | -0.59 | 1.99E-02 | histone H3.3                                                 |
| ENSMMUG000000003569 | <i>ARRDC3</i>       | -0.53 | 1.99E-02 | arrestin domain containing 3                                 |
| ENSMMUG000000048596 | <i>HILPDA</i>       | 0.72  | 1.99E-02 | hypoxia inducible lipid droplet associated                   |
| ENSMMUG000000014514 | <i>CXCL2</i>        | 1.30  | 1.99E-02 | C-X-C motif chemokine ligand 2                               |
| ENSMMUG000000000198 | <i>COLGALT1</i>     | -0.56 | 1.99E-02 | collagen beta(1-O)galactosyltransferase 1                    |
| ENSMMUG000000020148 | <i>BAG1</i>         | 0.59  | 2.01E-02 | BAG cochaperone 1                                            |
| ENSMMUG000000003709 | <i>MTFR2</i>        | 0.53  | 2.01E-02 | mitochondrial fission regulator 2                            |
| ENSMMUG000000020324 | <i>SMIM14</i>       | 0.51  | 2.02E-02 | small integral membrane protein 14                           |
| ENSMMUG000000022301 | <i>STK38L</i>       | -0.69 | 2.05E-02 | serine/threonine kinase 38 like                              |
| ENSMMUG000000010028 | <i>RAG2</i>         | -1.80 | 2.05E-02 | recombination activating 2                                   |

|                    |                     |       |          |                                                                  |
|--------------------|---------------------|-------|----------|------------------------------------------------------------------|
| ENSMMUG00000018268 | <i>LZTS3</i>        | 0.57  | 2.05E-02 | leucine zipper tumor suppressor family member 3                  |
| ENSMMUG00000023248 | <i>AHNAK</i>        | -0.48 | 2.05E-02 | AHNAK nucleoprotein                                              |
| ENSMMUG00000017252 | <i>SPATA20</i>      | -0.44 | 2.09E-02 | spermatogenesis associated 20                                    |
| ENSMMUG00000021702 | <i>CREB3L1</i>      | -0.60 | 2.09E-02 | cAMP responsive element binding protein 3 like 1                 |
| ENSMMUG00000018571 | <i>COA6</i>         | 0.86  | 2.09E-02 | cytochrome c oxidase assembly factor 6                           |
| ENSMMUG00000016897 | <i>SECTM1</i>       | 2.02  | 2.11E-02 | secreted and transmembrane 1                                     |
| ENSMMUG00000019774 | <i>MTHFD1L</i>      | 0.54  | 2.14E-02 | methylenetetrahydrofolate dehydrogenase (NADP+ dependent) 1 like |
| ENSMMUG00000022693 | <i>SLC8A1</i>       | -0.45 | 2.16E-02 | solute carrier family 8 member A1                                |
| ENSMMUG00000015508 | <i>OXNAD1</i>       | 0.48  | 2.16E-02 | oxidoreductase NAD binding domain containing 1                   |
| ENSMMUG00000016872 | <i>EFEMP1</i>       | -0.44 | 2.19E-02 | EGF containing fibulin extracellular matrix protein 1            |
| ENSMMUG00000004409 | <i>ZNF608</i>       | -0.60 | 2.20E-02 | zinc finger protein 608                                          |
| ENSMMUG00000002147 | <i>SSR1</i>         | 0.47  | 2.21E-02 | signal sequence receptor subunit 1                               |
| ENSMMUG00000047327 | <i>IGFBP7</i>       | -0.51 | 2.21E-02 | insulin like growth factor binding protein 7                     |
| ENSMMUG00000014011 | <i>SLC38A11</i>     | -0.51 | 2.21E-02 | solute carrier family 38 member 11                               |
| ENSMMUG00000048391 | <i>DDRKG1</i>       | 0.50  | 2.21E-02 | DDRKG domain containing 1                                        |
| ENSMMUG00000005009 | <i>LOC106996872</i> | 0.51  | 2.21E-02 | translocon-associated protein subunit gamma pseudogene           |
| ENSMMUG00000019018 | <i>SMAD6</i>        | -1.10 | 2.23E-02 | SMAD family member 6                                             |
| ENSMMUG00000024487 | <i>LOC114672518</i> | 0.64  | 2.24E-02 | small nucleolar RNA SNORD22                                      |
| ENSMMUG00000013494 | <i>EZH2</i>         | 0.54  | 2.32E-02 | enhancer of zeste 2 polycomb repressive complex 2 subunit        |
| ENSMMUG00000016970 | <i>SSR3</i>         | 0.49  | 2.32E-02 | signal sequence receptor subunit 3                               |
| ENSMMUG00000028673 | <i>TUBA1A</i>       | -0.42 | 2.35E-02 | tubulin alpha-1C chain                                           |
| ENSMMUG00000009788 | <i>ND5</i>          | -0.53 | 2.35E-02 | NADH ubiquinone oxidoreductase core subunit 5                    |
| ENSMMUG00000041498 | <i>TRAF1</i>        | 0.82  | 2.35E-02 | TNF receptor associated factor 1                                 |
| ENSMMUG00000048076 | <i>TNFRSF10B</i>    | 0.60  | 2.36E-02 | TNF receptor superfamily member 10b                              |
| ENSMMUG00000016009 | <i>LOC723733</i>    | 0.55  | 2.38E-02 | eukaryotic translation elongation factor 1 gamma-like            |
| ENSMMUG00000015093 | <i>VLDLR</i>        | 0.51  | 2.38E-02 | very low density lipoprotein receptor                            |
| ENSMMUG00000015585 | <i>GPT</i>          | -1.14 | 2.42E-02 | glutamic--pyruvic transaminase                                   |
| ENSMMUG00000003909 | <i>ST7</i>          | 0.49  | 2.45E-02 | suppression of tumorigenicity 7                                  |
| ENSMMUG00000021722 | <i>FTL</i>          | 0.60  | 2.45E-02 | ferritin light chain                                             |
| ENSMMUG00000048823 | <i>RHBDF2</i>       | 0.73  | 2.46E-02 | rhomboid 5 homolog 2                                             |
| ENSMMUG00000018973 | <i>N/A</i>          | -0.53 | 2.46E-02 | N/A                                                              |
| ENSMMUG00000014414 | <i>ABHD2</i>        | -0.49 | 2.47E-02 | abhydrolase domain containing 2, acylglycerol lipase             |
| ENSMMUG00000030744 | <i>ARID5A</i>       | 0.96  | 2.49E-02 | AT-rich interaction domain 5A                                    |
| ENSMMUG00000017123 | <i>PLA2G12A</i>     | 0.56  | 2.50E-02 | phospholipase A2 group X1IA                                      |
| ENSMMUG00000014430 | <i>FICD</i>         | 1.04  | 2.50E-02 | FIC domain protein adenyltransferase                             |
| ENSMMUG00000008177 | <i>FOSB</i>         | 2.81  | 2.50E-02 | FosB proto-oncogene, AP-1 transcription factor subunit           |
| ENSMMUG00000018639 | <i>MEX3B</i>        | -0.98 | 2.50E-02 | mex-3 RNA binding family member B                                |
| ENSMMUG00000042580 | <i>ARF1</i>         | 0.47  | 2.50E-02 | ADP ribosylation factor 1                                        |
| ENSMMUG00000016053 | <i>ZNF226</i>       | -0.56 | 2.50E-02 | zinc finger protein 226                                          |
| ENSMMUG00000047704 | <i>LIX1L</i>        | -0.51 | 2.50E-02 | limb and CNS expressed 1 like                                    |
| ENSMMUG00000017915 | <i>PAEP</i>         | -1.17 | 2.50E-02 | progesterone-associated endometrial protein                      |
| ENSMMUG00000046424 | <i>C11H12orf75</i>  | -0.47 | 2.54E-02 | chromosome 11 C12orf75 homolog                                   |
| ENSMMUG00000007665 | <i>HCFC1R1</i>      | 2.18  | 2.54E-02 | host cell factor C1 regulator 1                                  |
| ENSMMUG00000022672 | <i>HTRA3</i>        | -1.38 | 2.54E-02 | HtrA serine peptidase 3(HTRA3)                                   |
| ENSMMUG00000012618 | <i>SERPING1</i>     | -0.48 | 2.55E-02 | serpin family G member 1                                         |
| ENSMMUG00000022394 | <i>EGFR</i>         | 0.62  | 2.55E-02 | epidermal growth factor receptor                                 |
| ENSMMUG00000042327 | <i>N/A</i>          | 1.44  | 2.56E-02 | N/A                                                              |
| ENSMMUG00000020208 | <i>ELOVL4</i>       | 0.99  | 2.57E-02 | ELOVL fatty acid elongase 4                                      |
| ENSMMUG00000007400 | <i>TP53I3</i>       | 0.65  | 2.57E-02 | tumor protein p53 inducible protein 3                            |

|                    |              |       |          |                                                                        |
|--------------------|--------------|-------|----------|------------------------------------------------------------------------|
| ENSMMUG00000001283 | ZFP36L1      | -0.42 | 2.57E-02 | ZFP36 ring finger protein like 1                                       |
| ENSMMUG00000044603 | SIAH1        | 0.57  | 2.57E-02 | siah E3 ubiquitin protein ligase 1                                     |
| ENSMMUG00000019994 | SDCCAG8      | -0.46 | 2.57E-02 | SHH signaling and ciliogenesis regulator SDCCAG8                       |
| ENSMMUG00000008094 | DUSP4        | 0.98  | 2.57E-02 | dual specificity phosphatase 4                                         |
| ENSMMUG00000014952 | NUP210L      | 0.79  | 2.58E-02 | nucleoporin 210 like                                                   |
| ENSMMUG00000007918 | ZNHIT3       | 0.66  | 2.58E-02 | zinc finger HIT-type containing 3                                      |
| ENSMMUG00000022124 | STON2        | -0.57 | 2.64E-02 | stonin 2                                                               |
| ENSMMUG00000001031 | TMEM231      | 0.52  | 2.64E-02 | transmembrane protein 231                                              |
| ENSMMUG00000016074 | MYCL         | 1.10  | 2.64E-02 | MYCL proto-oncogene, bHLH transcription factor                         |
| ENSMMUG00000016223 | ABHD5        | 0.66  | 2.64E-02 | abhydrolase domain containing 5, lysophosphatidic acid acyltransferase |
| ENSMMUG00000001564 | LFNG         | -0.94 | 2.64E-02 | LFNG O-fucosylpeptide 3-beta-N-acetylglucosaminyltransferase           |
| ENSMMUG00000018379 | FAM13A       | -0.56 | 2.65E-02 | family with sequence similarity 13 member A                            |
| ENSMMUG00000010141 | DEPDC1B      | 0.83  | 2.65E-02 | DEP domain containing 1B                                               |
| ENSMMUG00000047033 | ULBP3        | 1.04  | 2.67E-02 | UL16-binding protein 3                                                 |
| ENSMMUG00000008247 | MXRA5        | -0.49 | 2.67E-02 | matrix remodeling associated 5                                         |
| ENSMMUG00000009615 | IMP4         | 0.51  | 2.67E-02 | IMP U3 small nucleolar ribonucleoprotein 4                             |
| ENSMMUG00000001172 | SOHLH2       | 1.44  | 2.68E-02 | spermatogenesis and oogenesis specific basic helix-loop-helix 2        |
| ENSMMUG00000005778 | TXNRD1       | 0.53  | 2.70E-02 | thioredoxin reductase 1                                                |
| ENSMMUG00000012091 | FOXC1        | 1.01  | 2.70E-02 | forkhead box C1                                                        |
| ENSMMUG00000019106 | MCAM         | 0.63  | 2.74E-02 | melanoma cell adhesion molecule                                        |
| ENSMMUG00000018601 | DDR1         | -0.49 | 2.74E-02 | discoidin domain receptor tyrosine kinase 1                            |
| ENSMMUG00000004764 | CDC14A       | 0.84  | 2.74E-02 | cell division cycle 14A                                                |
| ENSMMUG00000047349 | UPK3B        | -0.51 | 2.74E-02 | uroplakin 3B                                                           |
| ENSMMUG00000042176 | ERRFI1       | 0.86  | 2.75E-02 | ERBB receptor feedback inhibitor 1                                     |
| ENSMMUG00000042036 | GNG3         | -2.24 | 2.75E-02 | G protein subunit gamma 3                                              |
| ENSMMUG00000017745 | ANGPT1       | -1.01 | 2.77E-02 | angiopoietin 1                                                         |
| ENSMMUG00000021645 | RORA         | 0.90  | 2.77E-02 | RAR related orphan receptor A                                          |
| ENSMMUG00000044139 | TAX1BP3      | -0.40 | 2.77E-02 | Tax1 binding protein 3                                                 |
| ENSMMUG00000011757 | CHST10       | 0.63  | 2.77E-02 | carbohydrate sulfotransferase 10                                       |
| ENSMMUG00000018192 | ERO1B        | 0.61  | 2.77E-02 | endoplasmic reticulum oxidoreductase 1 beta                            |
| ENSMMUG00000023390 | WWC3         | -0.42 | 2.77E-02 | WWC family member 3                                                    |
| ENSMMUG00000016290 | NUP188       | 0.45  | 2.77E-02 | nucleoporin 188                                                        |
| ENSMMUG00000010405 | FAM171B      | 0.69  | 2.81E-02 | family with sequence similarity 171 member B                           |
| ENSMMUG00000011262 | PDE7A        | -0.61 | 2.82E-02 | phosphodiesterase 7A                                                   |
| ENSMMUG00000031713 | TMEM19       | -0.58 | 2.90E-02 | transmembrane protein 19                                               |
| ENSMMUG00000020948 | LOC106995399 | 0.65  | 2.90E-02 | cytochrome c-like                                                      |
| ENSMMUG00000012324 | LOC713150    | 0.60  | 2.90E-02 | aldo-keto reductase family 1 member B10-like                           |
| ENSMMUG00000022386 | NXT1         | 0.62  | 2.96E-02 | nuclear transport factor 2 like export factor 1                        |
| ENSMMUG00000006582 | PLK3         | 1.08  | 2.97E-02 | polo like kinase 3                                                     |
| ENSMMUG00000012511 | GNL3         | 0.42  | 2.99E-02 | G protein nucleolar 3                                                  |
| ENSMMUG00000018485 | METTL7A      | -0.48 | 3.01E-02 | methyltransferase like 7A                                              |
| ENSMMUG00000013020 | GSN          | -0.41 | 3.06E-02 | gelsolin                                                               |
| ENSMMUG00000009012 | FAM3A        | -0.43 | 3.07E-02 | FAM3 metabolism regulating signaling molecule A                        |
| ENSMMUG00000018901 | LRRC59       | 0.54  | 3.07E-02 | leucine rich repeat containing 59                                      |
| ENSMMUG00000017234 | FGD6         | -0.51 | 3.07E-02 | FYVE, RhoGEF and PH domain containing 6                                |
| ENSMMUG00000010653 | MFSD12       | -0.48 | 3.07E-02 | major facilitator superfamily domain containing 12                     |
| ENSMMUG00000010514 | SLC6A20      | -0.70 | 3.07E-02 | solute carrier family 6 member 20                                      |
| ENSMMUG00000017856 | APH1B        | -0.50 | 3.10E-02 | Aph-1 homolog B, gamma-secretase subunit                               |
| ENSMMUG00000018683 | TNS2         | -0.49 | 3.10E-02 | tensin 2                                                               |
| ENSMMUG00000000318 | NOP2         | 0.55  | 3.10E-02 | NOP2 nucleolar protein                                                 |
| ENSMMUG00000001151 | MTUS1        | -0.57 | 3.10E-02 | microtubule associated scaffold protein 1                              |

|                    |                    |       |          |                                                               |
|--------------------|--------------------|-------|----------|---------------------------------------------------------------|
| ENSMMUG00000016552 | <i>INF2</i>        | -0.55 | 3.11E-02 | inverted formin 2                                             |
| ENSMMUG00000011497 | <i>WDR44</i>       | -0.47 | 3.12E-02 | WD repeat domain 44                                           |
| ENSMMUG00000006657 | <i>MYPN</i>        | 0.81  | 3.12E-02 | myopalladin                                                   |
| ENSMMUG00000006867 | <i>FEN1</i>        | 0.50  | 3.12E-02 | flap structure-specific endonuclease 1                        |
| ENSMMUG00000021517 | <i>SCARA3</i>      | -0.48 | 3.14E-02 | scavenger receptor class A member 3                           |
| ENSMMUG00000001955 | <i>C11H12orf66</i> | 0.84  | 3.15E-02 | KICSTOR subunit 2                                             |
| ENSMMUG00000013587 | <i>PLCD3</i>       | -0.44 | 3.15E-02 | phospholipase C delta 3                                       |
| ENSMMUG00000022404 | <i>APAF1</i>       | -0.45 | 3.16E-02 | apoptotic peptidase activating factor 1                       |
| ENSMMUG00000021189 | <i>RF02216</i>     | 0.81  | 3.18E-02 | NA                                                            |
| ENSMMUG00000042971 | <i>CD59</i>        | -0.45 | 3.18E-02 | CD59 molecule (CD59 blood group)                              |
| ENSMMUG00000011305 | <i>TMTC2</i>       | -0.52 | 3.18E-02 | transmembrane O-mannosyltransferase targeting<br>cadherins 2  |
| ENSMMUG00000011209 | <i>BICDL1</i>      | -0.50 | 3.19E-02 | BICD family like cargo adaptor 1                              |
| ENSMMUG00000006984 | <i>FBXO33</i>      | -0.52 | 3.19E-02 | F-box protein 33                                              |
| ENSMMUG00000015929 | N/A                | -1.33 | 3.19E-02 | N/A                                                           |
| ENSMMUG00000020912 | <i>SMOX</i>        | 0.99  | 3.20E-02 | spermine oxidase                                              |
| ENSMMUG00000001690 | <i>CNN3</i>        | -0.46 | 3.22E-02 | calponin 3                                                    |
| ENSMMUG00000021847 | <i>MYLPF</i>       | -0.82 | 3.24E-02 | myosin light chain, phosphorylatable, fast skeletal<br>muscle |
| ENSMMUG00000020354 | <i>SLC3A2</i>      | 0.90  | 3.27E-02 | solute carrier family 3 member 2                              |
| ENSMMUG00000023251 | <i>KANK2</i>       | -0.42 | 3.28E-02 | KN motif and ankyrin repeat domains 2                         |
| ENSMMUG00000015125 | <i>PBLD</i>        | -0.43 | 3.30E-02 | phenazine biosynthesis like protein domain contain-<br>ing    |
| ENSMMUG00000010180 | <i>SOX7</i>        | 0.64  | 3.30E-02 | SRY-box transcription factor 7                                |
| ENSMMUG00000004103 | <i>TXNL4B</i>      | 0.71  | 3.35E-02 | thioredoxin like 4B                                           |
| ENSMMUG00000048989 | <i>COL11A1</i>     | -0.49 | 3.35E-02 | collagen type XI alpha 1 chain                                |
| ENSMMUG00000023225 | <i>E2F6</i>        | 0.57  | 3.35E-02 | E2F transcription factor 6                                    |
| ENSMMUG00000020226 | <i>WBS1</i>        | -0.47 | 3.35E-02 | WD repeat and SOCS box containing 1                           |
| ENSMMUG00000014183 | <i>PLEKHF2</i>     | -0.66 | 3.39E-02 | pleckstrin homology and FYVE domain containing 2              |
| ENSMMUG00000002242 | <i>VEGFA</i>       | 0.74  | 3.42E-02 | vascular endothelial growth factor A                          |
| ENSMMUG00000004577 | <i>MECOM</i>       | -0.65 | 3.42E-02 | MDS1 and EVI1 complex locus                                   |
| ENSMMUG00000012821 | <i>PCYT1B</i>      | -1.61 | 3.46E-02 | phosphate cytidylyltransferase 1B, choline                    |
| ENSMMUG00000002404 | <i>MINK1</i>       | -0.42 | 3.47E-02 | misshapen like kinase 1                                       |
| ENSMMUG00000019369 | <i>PLEKHG2</i>     | -0.62 | 3.48E-02 | pleckstrin homology and RhoGEF domain containing<br>G2        |
| ENSMMUG00000010944 | <i>GATA6</i>       | -0.52 | 3.52E-02 | GATA binding protein 6                                        |
| ENSMMUG00000004416 | <i>BYSL</i>        | 0.50  | 3.56E-02 | bystin like                                                   |
| ENSMMUG00000020119 | <i>IFRD2</i>       | 0.46  | 3.56E-02 | interferon related developmental regulator 2                  |
| ENSMMUG00000004559 | <i>SLC16A4</i>     | -0.60 | 3.59E-02 | solute carrier family 16 member 4                             |
| ENSMMUG00000008710 | <i>TFEC</i>        | -0.86 | 3.59E-02 | transcription factor EC                                       |
| ENSMMUG00000015022 | <i>KCND1</i>       | -1.61 | 3.59E-02 | potassium voltage-gated channel subfamily D mem-<br>ber 1     |
| ENSMMUG00000038489 | <i>PCDH1</i>       | 0.57  | 3.59E-02 | protocadherin 1                                               |
| ENSMMUG00000031161 | <i>GMNC</i>        | -1.15 | 3.59E-02 | geminin coiled-coil domain containing                         |
| ENSMMUG00000003100 | <i>CHML</i>        | -0.57 | 3.59E-02 | CHM like Rab escort protein                                   |
| ENSMMUG00000001895 | <i>NDUFAF4</i>     | 0.42  | 3.59E-02 | NADH:ubiquinone oxidoreductase complex assem-<br>bly factor 4 |
| ENSMMUG00000018843 | <i>TMEM39A</i>     | 0.73  | 3.59E-02 | transmembrane protein 39A                                     |
| ENSMMUG00000012010 | N/A                | 1.75  | 3.59E-02 | N/A                                                           |
| ENSMMUG00000039762 | <i>MYORG</i>       | -0.62 | 3.62E-02 | Myogenesis regulating glycosidase (putative)                  |
| ENSMMUG00000019974 | <i>NARS</i>        | 0.50  | 3.62E-02 | asparaginyl-tRNA synthetase 1                                 |
| ENSMMUG00000013718 | <i>TRAM2</i>       | -0.51 | 3.63E-02 | translocation associated membrane protein 2                   |
| ENSMMUG00000013848 | <i>FUT8</i>        | -0.44 | 3.66E-02 | fucosyltransferase 8                                          |
| ENSMMUG00000008101 | <i>SPATS2L</i>     | -0.40 | 3.69E-02 | spermatogenesis associated serine rich 2 like                 |

|                     |                     |       |          |                                                                         |
|---------------------|---------------------|-------|----------|-------------------------------------------------------------------------|
| ENSMMUG00000004020  | <i>FUT1</i>         | 1.50  | 3.70E-02 | fucosyltransferase 1 (H blood group)                                    |
| ENSMMUG00000012254  | <i>ARHGEF12</i>     | -0.49 | 3.71E-02 | Rho guanine nucleotide exchange factor 12                               |
| ENSMMUG00000009511  | <i>TRIB1</i>        | 0.95  | 3.75E-02 | tribbles pseudokinase 1                                                 |
| ENSMMUG00000002116  | <i>ASB1</i>         | 0.73  | 3.75E-02 | ankyrin repeat and SOCS box containing 1                                |
| ENSMMUG00000004885  | <i>BTG3</i>         | 0.43  | 3.75E-02 | BTG anti-proliferation factor 3                                         |
| ENSMMUG000000021759 | <i>QSOX2</i>        | 0.53  | 3.75E-02 | quiescin sulphydryl oxidase 2                                           |
| ENSMMUG00000015414  | <i>FAM160B1</i>     | -0.51 | 3.75E-02 | FHF complex subunit HOOK interacting protein 2A                         |
| ENSMMUG000000020664 | <i>FLRT2</i>        | -0.46 | 3.75E-02 | fibronectin leucine rich transmembrane protein 2                        |
| ENSMMUG000000005573 | <i>LMBRD1</i>       | -0.49 | 3.78E-02 | LMBR1 domain containing 1                                               |
| ENSMMUG00000015860  | <i>C11H12orf29</i>  | 0.69  | 3.79E-02 | chromosome 11 C12orf29 homolog                                          |
| ENSMMUG00000018095  | <i>EIF2S2</i>       | 0.46  | 3.81E-02 | eukaryotic translation initiation factor 2 subunit beta                 |
| ENSMMUG00000013984  | <i>ABLIM2</i>       | -0.70 | 3.83E-02 | actin binding LIM protein family member 2                               |
| ENSMMUG00000005355  | <i>TIMP2</i>        | -0.50 | 3.86E-02 | TIMP metalloproteinase inhibitor 2                                      |
| ENSMMUG00000001811  | <i>FMN1</i>         | -0.64 | 3.86E-02 | formin 1                                                                |
| ENSMMUG00000001511  | <i>SMIM3</i>        | 0.45  | 3.86E-02 | small integral membrane protein 3                                       |
| ENSMMUG000000040546 | <i>KIF20A</i>       | -0.89 | 3.86E-02 | kinesin family member 20A                                               |
| ENSMMUG000000020823 | <i>VCL</i>          | -0.53 | 3.86E-02 | vinculin                                                                |
| ENSMMUG000000040229 | <i>N/A</i>          | -1.34 | 3.89E-02 | N/A                                                                     |
| ENSMMUG000000023406 | <i>HID1</i>         | 0.56  | 3.89E-02 | HID1 domain containing                                                  |
| ENSMMUG00000017232  | <i>BMPER</i>        | 0.76  | 3.90E-02 | BMP binding endothelial regulator                                       |
| ENSMMUG000000046717 | <i>LOC100427851</i> | 0.92  | 3.92E-02 | Ferritin light chain pseudogene                                         |
| ENSMMUG00000016810  | <i>PAX6</i>         | -0.41 | 3.94E-02 | paired box 6                                                            |
| ENSMMUG00000015352  | <i>ECHDC1</i>       | -0.51 | 3.96E-02 | ethylmalonyl-CoA decarboxylase 1                                        |
| ENSMMUG00000015925  | <i>GRK2</i>         | 0.41  | 3.96E-02 | G protein-coupled receptor kinase 2                                     |
| ENSMMUG00000012563  | <i>IFNAR2</i>       | 0.45  | 3.97E-02 | interferon alpha and beta receptor subunit 2                            |
| ENSMMUG00000012243  | <i>APBB2</i>        | -0.40 | 3.97E-02 | amyloid beta precursor protein binding family B member 2                |
| ENSMMUG000000022702 | <i>GART</i>         | 0.43  | 3.97E-02 | phosphoribosylglycinamide formyltransferase                             |
| ENSMMUG00000003956  | <i>FAM76A</i>       | -0.47 | 3.97E-02 | family with sequence similarity 76 member A                             |
| ENSMMUG00000000123  | <i>NHSL1</i>        | 0.69  | 3.98E-02 | NHS like 1                                                              |
| ENSMMUG000000021813 | <i>NDUFAF2</i>      | 0.65  | 3.99E-02 | NADH:ubiquinone oxidoreductase complex assembly factor 2                |
| ENSMMUG000000047687 | <i>RF01871</i>      | -0.68 | 3.99E-02 | N/A                                                                     |
| ENSMMUG00000009926  | <i>SERPINE1</i>     | 0.57  | 4.00E-02 | serpin family E member 1                                                |
| ENSMMUG00000009559  | <i>MCMBP</i>        | 0.44  | 4.02E-02 | minichromosome maintenance complex binding protein                      |
| ENSMMUG00000015540  | <i>BTBD11</i>       | -0.47 | 4.05E-02 | BTB domain containing 11                                                |
| ENSMMUG000000037904 | <i>PGRMC2</i>       | -0.46 | 4.05E-02 | progesterone receptor membrane component 2                              |
| ENSMMUG000000000427 | <i>BUD31</i>        | 0.51  | 4.07E-02 | BUD31 homolog                                                           |
| ENSMMUG000000030046 | <i>FNIP2</i>        | 0.82  | 4.07E-02 | folliculin interacting protein 2                                        |
| ENSMMUG000000023056 | <i>CLCN5</i>        | 0.64  | 4.10E-02 | chloride voltage-gated channel 5                                        |
| ENSMMUG000000022060 | <i>ARHGAP9</i>      | 1.57  | 4.11E-02 | Rho GTPase activating protein 9                                         |
| ENSMMUG000000006841 | <i>MYOF</i>         | -0.39 | 4.12E-02 | myoferlin                                                               |
| ENSMMUG00000013782  | <i>LAMA4</i>        | -0.37 | 4.14E-02 | laminin subunit alpha 4                                                 |
| ENSMMUG000000032084 | <i>PARS2</i>        | 0.51  | 4.14E-02 | prolyl-tRNA synthetase 2, mitochondrial                                 |
| ENSMMUG000000021243 | <i>ZBTB47</i>       | -0.48 | 4.15E-02 | zinc finger and BTB domain containing 47                                |
| ENSMMUG000000004408 | <i>SEC11C</i>       | 0.48  | 4.16E-02 | SEC11 homolog C, signal peptidase complex subunit                       |
| ENSMMUG000000003154 | <i>SLC39A4</i>      | -0.61 | 4.16E-02 | solute carrier family 39 member 4                                       |
| ENSMMUG000000000750 | <i>RFFL</i>         | 0.53  | 4.16E-02 | ring finger and FYVE like domain containing E3 ubiquitin protein ligase |
| ENSMMUG00000013888  | <i>NOP56</i>        | 0.54  | 4.16E-02 | NOP56 ribonucleoprotein                                                 |
| ENSMMUG000000002100 | <i>MITF</i>         | -0.59 | 4.17E-02 | melanocyte inducing transcription factor                                |
| ENSMMUG00000011665  | <i>MMAB</i>         | -0.49 | 4.21E-02 | metabolism of cobalamin associated B                                    |
| ENSMMUG00000017161  | <i>ANKRD11</i>      | 0.45  | 4.22E-02 | ankyrin repeat domain containing 11                                     |

|                    |                   |       |          |                                                                          |
|--------------------|-------------------|-------|----------|--------------------------------------------------------------------------|
| ENSMMUG00000040952 | <i>TIGD7</i>      | -1.11 | 4.22E-02 | tigger transposable element derived 7                                    |
| ENSMMUG00000009549 | <i>CLDND1</i>     | 0.50  | 4.24E-02 | claudin domain containing 1                                              |
| ENSMMUG00000011218 | <i>SERPINA3</i>   | 1.66  | 4.24E-02 | serpin family A member 3                                                 |
| ENSMMUG00000001941 | <i>CXXC5</i>      | -0.42 | 4.25E-02 | CXXC finger protein 5                                                    |
| ENSMMUG00000021181 | <i>PCDH10</i>     | -1.63 | 4.25E-02 | protocadherin 10                                                         |
| ENSMMUG00000004930 | <i>MAP3K8</i>     | 0.89  | 4.25E-02 | mitogen-activated protein kinase kinase kinase 8                         |
| ENSMMUG00000001420 | <i>SESN3</i>      | -0.50 | 4.25E-02 | sestrin 3                                                                |
| ENSMMUG00000023149 | <i>MFAP2</i>      | -0.79 | 4.25E-02 | microfibril associated protein 2                                         |
| ENSMMUG00000009394 | <i>LRRC25</i>     | 1.42  | 4.25E-02 | leucine rich repeat containing 25                                        |
| ENSMMUG00000005469 | <i>ERMP1</i>      | -0.55 | 4.29E-02 | endoplasmic reticulum metalloproteinase 1                                |
| ENSMMUG00000046631 | <i>RFLNA</i>      | -0.59 | 4.29E-02 | refilin A                                                                |
| ENSMMUG00000005959 | <i>GK</i>         | 0.74  | 4.30E-02 | glycerol kinase                                                          |
| ENSMMUG00000020147 | <i>CSRNP1</i>     | 0.76  | 4.30E-02 | glycerol kinase                                                          |
| ENSMMUG00000013716 | <i>EFHC1</i>      | -0.43 | 4.34E-02 | cysteine and serine rich nuclear protein 1                               |
| ENSMMUG00000028670 | <i>FGF2</i>       | 0.57  | 4.34E-02 | EF-hand domain containing 1                                              |
| ENSMMUG00000007419 | <i>GASK1B</i>     | -0.70 | 4.37E-02 | fibroblast growth factor 2                                               |
| ENSMMUG00000008547 | <i>CYTB</i>       | -0.51 | 4.37E-02 | golgi associated kinase 1B                                               |
| ENSMMUG00000019238 | <i>RNPS1</i>      | 0.42  | 4.37E-02 | Cytochrome b                                                             |
| ENSMMUG00000019634 | <i>RRP12</i>      | 0.67  | 4.40E-02 | RNA binding protein with serine rich domain 1                            |
| ENSMMUG00000009833 | <i>SHC4</i>       | 1.14  | 4.40E-02 | ribosomal RNA processing 12 homolog                                      |
| ENSMMUG00000019993 | <i>SESN2</i>      | 1.00  | 4.42E-02 | SHC adaptor protein 4                                                    |
| ENSMMUG00000047956 | <i>CDC42SE2</i>   | 0.47  | 4.43E-02 | sestrin 2                                                                |
| ENSMMUG00000001134 | <i>LOC709988</i>  | -0.43 | 4.44E-02 | CDC42 small effector 2                                                   |
| ENSMMUG00000018870 | <i>C15H9orf64</i> | 0.55  | 4.47E-02 | cyclin-dependent kinase inhibitor 2A                                     |
| ENSMMUG00000015758 | <i>GLIS2</i>      | -0.80 | 4.51E-02 | chromosome 15 C9orf64 homolog                                            |
| ENSMMUG00000015774 | <i>NPM3</i>       | 0.45  | 4.51E-02 | GLIS family zinc finger 2                                                |
| ENSMMUG00000020359 | <i>SPTBN2</i>     | -0.62 | 4.51E-02 | nucleophosmin/nucleoplasmin 3                                            |
| ENSMMUG00000017133 | <i>SLC12A6</i>    | -0.43 | 4.51E-02 | spectrin beta, non-erythrocytic 2                                        |
| ENSMMUG00000020935 | <i>N/A</i>        | 0.53  | 4.52E-02 | solute carrier family 12 member 6                                        |
| ENSMMUG00000019269 | <i>ACTR8</i>      | 0.44  | 4.52E-02 | N/A                                                                      |
| ENSMMUG00000011513 | <i>VCAN</i>       | -0.55 | 4.57E-02 | actin related protein 8                                                  |
| ENSMMUG00000014122 | <i>CAV1</i>       | -0.53 | 4.62E-02 | versican                                                                 |
| ENSMMUG00000000873 | <i>TRPV2</i>      | -0.50 | 4.64E-02 | caveolin 1                                                               |
| ENSMMUG00000015614 | <i>RABGGTB</i>    | 0.50  | 4.66E-02 | transient receptor potential cation channel subfamily V member 2         |
| ENSMMUG00000007367 | <i>RARB</i>       | -0.79 | 4.66E-02 | Rab geranylgeranyltransferase subunit beta                               |
| ENSMMUG00000030573 | <i>ADIRF</i>      | -0.43 | 4.67E-02 | retinoic acid receptor beta                                              |
| ENSMMUG00000020074 | <i>PKDCC</i>      | -0.47 | 4.69E-02 | adipogenesis regulatory factor                                           |
| ENSMMUG00000019746 | <i>YARS</i>       | 0.48  | 4.69E-02 | protein kinase domain containing, cytoplasmic                            |
| ENSMMUG00000013359 | <i>SLC11A1</i>    | -0.60 | 4.74E-02 | tyrosyl-tRNA synthetase 1                                                |
| ENSMMUG00000006553 | <i>DVL3</i>       | -0.45 | 4.75E-02 | solute carrier family 11 member 1                                        |
| ENSMMUG00000020965 | <i>EFNB1</i>      | -0.42 | 4.77E-02 | dishevelled segment polarity protein 3                                   |
| ENSMMUG00000006548 | <i>SH2D4A</i>     | -0.60 | 4.79E-02 | ephrin B1                                                                |
| ENSMMUG00000000129 | <i>KIAA1549</i>   | -0.53 | 4.81E-02 | SH2 domain containing 4A                                                 |
| ENSMMUG00000021053 | <i>ANXA6</i>      | -0.43 | 4.81E-02 | KIAA1549                                                                 |
| ENSMMUG00000041923 | <i>NFKBIE</i>     | 0.54  | 4.82E-02 | annexin A6                                                               |
| ENSMMUG00000022689 | <i>NANS</i>       | 0.45  | 4.83E-02 | NFKB inhibitor epsilon                                                   |
| ENSMMUG00000015072 | <i>PREX1</i>      | 0.56  | 4.83E-02 | N-acetylneuraminase synthase                                             |
| ENSMMUG00000041404 | <i>LYNX1</i>      | -0.40 | 4.84E-02 | phosphatidylinositol-3,4,5-trisphosphate dependent Rac exchange factor 1 |
| ENSMMUG00000042262 | <i>PMP22</i>      | -0.42 | 4.85E-02 | Ly6/neurotoxin 1                                                         |
| ENSMMUG00000002206 | <i>NOS1AP</i>     | -1.11 | 4.85E-02 | peripheral myelin protein 22                                             |
| ENSMMUG00000003036 | <i>GMIP</i>       | -0.72 | 4.85E-02 | nitric oxide synthase 1 adaptor protein                                  |
| ENSMMUG00000019393 | <i>TNS3</i>       | -0.39 | 4.86E-02 | GEM interacting protein                                                  |

---

|                    |               |       |          |                                           |
|--------------------|---------------|-------|----------|-------------------------------------------|
| ENSMMUG00000021553 | <i>DHRS13</i> | 0.90  | 4.90E-02 | tensin 3                                  |
| ENSMMUG00000044197 | <i>INHBA</i>  | -0.73 | 4.91E-02 | dehydrogenase/reductase 13                |
| ENSMMUG00000006069 | <i>FNDC11</i> | -0.81 | 4.95E-02 | inhibin subunit beta A                    |
| ENSMMUG00000019983 | <i>IL6</i>    | 1.36  | 4.98E-02 | fibronectin type III domain containing 11 |
| ENSMMUG00000001226 | <i>HMGCS1</i> | -3.10 | 4.98E-02 | interleukin 6                             |

---



**Table S2.** Complete list of the reversion effect exert by 10  $\mu$ M treatment over 15  $\mu$ M 7KCh-altered genes in mRPE cells. Log2FC and FDR values correspond to the comparison of the combined treatment with 7KCh alone.

| Ensemble ID         | Gene ID         | Log2FC | FDR      | Gene description                                       |
|---------------------|-----------------|--------|----------|--------------------------------------------------------|
| ENSMMUG00000001618  | <i>ATP6V0D2</i> | -4.77  | 4.67E-60 | ATPase H <sup>+</sup> transporting V0 subunit D2       |
| ENSMMUG000000012185 | <i>ATF3</i>     | -2.36  | 2.29E-30 | activating transcription factor 3                      |
| ENSMMUG00000000208  | <i>NRG1</i>     | -2.28  | 4.08E-30 | neuregulin 1                                           |
| ENSMMUG000000011593 | <i>RGCC</i>     | -3.57  | 1.62E-29 | regulator of cell cycle                                |
| ENSMMUG000000000006 | <i>NEURL3</i>   | -4.23  | 8.12E-28 | neuralized E3 ubiquitin protein ligase 3               |
| ENSMMUG000000019777 | <i>IL1A</i>     | -3.07  | 7.81E-25 | interleukin 1 alpha                                    |
| ENSMMUG000000010189 | <i>TMEM71</i>   | -2.68  | 5.16E-23 | transmembrane protein 71                               |
| ENSMMUG000000001511 | <i>KIF20A</i>   | 2.00   | 1.62E-21 | kinesin family member 20A                              |
| ENSMMUG000000009852 | <i>CASP1</i>    | -2.10  | 4.20E-21 | caspase-1                                              |
| ENSMMUG000000014176 | <i>CYTIP</i>    | -2.69  | 7.14E-21 | cytohesin 1 interacting protein                        |
| ENSMMUG000000023801 | <i>LCN2</i>     | -2.65  | 2.27E-19 | lipocalin 2                                            |
| ENSMMUG000000045506 | <i>MAFF</i>     | -1.79  | 3.47E-19 | MAF bZIP transcription factor F                        |
| ENSMMUG000000014430 | <i>FOSB</i>     | -4.42  | 5.08E-19 | FosB proto-oncogene, AP-1 transcription factor subunit |
| ENSMMUG000000041958 | <i>BHLHA15</i>  | -4.03  | 2.53E-18 | basic helix-loop-helix family member a15               |
| ENSMMUG000000019326 | <i>CTH</i>      | -1.71  | 2.83E-18 | cystathionine gamma-lyase                              |
| ENSMMUG000000007037 | <i>UPP1</i>     | -1.71  | 3.54E-18 | uridine phosphorylase 1                                |
| ENSMMUG000000044653 | <i>CLDN4</i>    | -2.58  | 6.60E-17 | claudin 4                                              |
| ENSMMUG000000008335 | <i>SAT1</i>     | -1.60  | 1.42E-16 | spermidine/spermine N1-acetyltransferase 1             |
| ENSMMUG000000003708 | <i>PDE7B</i>    | -2.11  | 1.45E-16 | phosphodiesterase 7B                                   |
| ENSMMUG000000013290 | <i>LURAP1L</i>  | -1.92  | 9.56E-16 | leucine rich adaptor protein 1 like                    |
| ENSMMUG000000048596 | <i>CXCL2</i>    | -2.07  | 1.94E-14 | C-X-C motif chemokine ligand 2                         |
| ENSMMUG000000009223 | <i>PPP1R15A</i> | -1.53  | 2.09E-14 | protein phosphatase 1 regulatory subunit 15A           |
| ENSMMUG000000006867 | <i>MYPN</i>     | -2.62  | 2.88E-14 | myopalladin                                            |
| ENSMMUG000000006088 | <i>KLF4</i>     | -2.12  | 3.03E-14 | Kruppel like factor 4                                  |
| ENSMMUG000000004504 | <i>KITLG</i>    | -2.23  | 4.19E-14 | KIT ligand                                             |
| ENSMMUG000000004403 | <i>ID1</i>      | 1.46   | 6.12E-14 | inhibitor of DNA binding 1, HLH protein                |
| ENSMMUG000000020806 | <i>ABCC9</i>    | -2.05  | 7.20E-14 | ATP binding cassette subfamily C member 9              |
| ENSMMUG000000019157 | <i>ASNS</i>     | -1.42  | 8.22E-14 | asparagine synthetase (glutamine-hydrolyzing)          |
| ENSMMUG000000008869 | <i>TNFAIP3</i>  | -1.77  | 2.26E-13 | TNF alpha induced protein 3                            |
| ENSMMUG000000020157 | <i>GBP6</i>     | -1.94  | 3.77E-12 | guanylate binding protein family member 6              |
| ENSMMUG000000015329 | <i>MX1</i>      | -2.29  | 4.73E-12 | MX dynamin like GTPase 1                               |
| ENSMMUG000000003721 | <i>KLF15</i>    | -2.49  | 1.07E-11 | Kruppel like factor 15                                 |
| ENSMMUG000000011868 | <i>PSAT1</i>    | -1.28  | 1.93E-11 | phosphoserine aminotransferase 1                       |
| ENSMMUG000000010927 | <i>TNFAIP6</i>  | -2.04  | 2.54E-11 | TNF alpha induced protein 6                            |
| ENSMMUG000000016040 | <i>RND3</i>     | -1.27  | 2.64E-11 | Rho family GTPase 3                                    |
| ENSMMUG000000023089 | <i>PHGDH</i>    | -1.46  | 2.64E-11 | phosphoglycerate dehydrogenase                         |
| ENSMMUG000000012600 | <i>TRIB3</i>    | -1.23  | 1.93E-10 | tribbles pseudokinase 3                                |
| ENSMMUG000000019983 | <i>IL6</i>      | -2.28  | 1.16E-09 | interleukin 6                                          |
| ENSMMUG000000005947 | <i>SAMD11</i>   | 1.33   | 2.24E-09 | sterile alpha motif domain containing 11               |
| ENSMMUG000000016938 | <i>DFNA5</i>    | -1.21  | 2.60E-09 | gasdermin E                                            |
| ENSMMUG000000019996 | <i>ENC1</i>     | 1.21   | 2.90E-09 | ectodermal-neural cortex 1                             |
| ENSMMUG000000023257 | <i>NFIL3</i>    | -1.41  | 4.91E-09 | nuclear factor, interleukin 3 regulated                |
| ENSMMUG000000042454 | <i>PHLDA1</i>   | -1.15  | 4.91E-09 | pleckstrin homology like domain family A member 1      |
| ENSMMUG000000008033 | <i>IFRD1</i>    | -1.16  | 6.55E-09 | interferon related developmental regulator 1           |
| ENSMMUG000000000947 | <i>MSC</i>      | -1.16  | 6.56E-09 | musculin                                               |
| ENSMMUG000000022481 | <i>CYP1A1</i>   | -2.54  | 7.50E-09 | cytochrome P450 family 1 subfamily A member 1          |
| ENSMMUG000000015158 | <i>SLC6A9</i>   | -1.32  | 8.81E-09 | solute carrier family 6 member 9                       |
| ENSMMUG000000010601 | <i>PRG2</i>     | -1.58  | 8.81E-09 | proteoglycan 2, pro eosinophil major basic protein     |

|                    |                  |       |          |                                                                        |
|--------------------|------------------|-------|----------|------------------------------------------------------------------------|
| ENSMMUG00000032156 | <i>C3AR1</i>     | -1.53 | 1.20E-08 | complement C3a receptor 1                                              |
| ENSMMUG00000009289 | <i>CBS</i>       | -1.47 | 1.20E-08 | cystathionine beta-synthase                                            |
| ENSMMUG00000001819 | <i>ISG15</i>     | -1.32 | 1.29E-08 | ISG15 ubiquitin like modifier                                          |
| ENSMMUG00000000567 | <i>BAMBI</i>     | 1.20  | 2.30E-08 | BMP and activin membrane bound inhibitor                               |
| ENSMMUG00000006269 | <i>CSTA</i>      | -2.05 | 3.69E-08 | cystatin A                                                             |
| ENSMMUG00000009084 | <i>TM6SF1</i>    | -2.72 | 3.98E-08 | transmembrane 6 superfamily member 1                                   |
| ENSMMUG00000019993 | <i>SESN2</i>     | -1.05 | 1.35E-07 | sestrin 2                                                              |
| ENSMMUG00000045219 | <i>CEBPB</i>     | -1.20 | 1.58E-07 | CCAAT enhancer binding protein beta                                    |
| ENSMMUG00000017169 | <i>FAM107B</i>   | -1.33 | 1.58E-07 | family with sequence similarity 107 member B                           |
| ENSMMUG00000011845 | <i>HK2</i>       | -1.09 | 2.31E-07 | hexokinase 2                                                           |
| ENSMMUG00000016848 | <i>SLCO4A1</i>   | -1.06 | 2.38E-07 | solute carrier organic anion transporter family member 4A1             |
| ENSMMUG00000013610 | <i>ETV5</i>      | -1.04 | 2.50E-07 | ETS variant transcription factor 5                                     |
| ENSMMUG00000022873 | <i>SERPINB8</i>  | -1.19 | 2.75E-07 | serpin family B member 8                                               |
| ENSMMUG00000007090 | <i>DOK5</i>      | -1.10 | 2.90E-07 | docking protein 5                                                      |
| ENSMMUG00000019992 | <i>GRB10</i>     | -1.63 | 3.32E-07 | growth factor receptor bound protein 10                                |
| ENSMMUG00000008140 | <i>SGK1</i>      | -1.01 | 4.12E-07 | serum/glucocorticoid regulated kinase 1                                |
| ENSMMUG00000000265 | <i>ADAMTS9</i>   | -1.34 | 5.22E-07 | ADAM metalloproteinase with thrombospondin type 1 motif 9              |
| ENSMMUG00000039576 | <i>N/A</i>       | -1.00 | 6.78E-07 | N/A                                                                    |
| ENSMMUG00000013797 | <i>GFPT1</i>     | -1.01 | 8.26E-07 | glutamine--fructose-6-phosphate transaminase 1                         |
| ENSMMUG00000019849 | <i>BMP2</i>      | -1.30 | 9.44E-07 | bone morphogenetic protein 2                                           |
| ENSMMUG00000002052 | <i>SPSB1</i>     | -1.22 | 9.48E-07 | splA/ryanodine receptor domain and SOCS box containing 1               |
| ENSMMUG00000004577 | <i>VEGFA</i>     | -0.97 | 1.15E-06 | vascular endothelial growth factor A                                   |
| ENSMMUG00000009914 | <i>SMAD9</i>     | 1.30  | 1.82E-06 | SMAD family member 9                                                   |
| ENSMMUG00000013059 | <i>GPR180</i>    | -0.97 | 1.83E-06 | G protein-coupled receptor 180                                         |
| ENSMMUG00000020608 | <i>ABCA1</i>     | -0.96 | 3.65E-06 | ATP binding cassette subfamily A member 1                              |
| ENSMMUG00000040573 | <i>PMAIP1</i>    | -1.13 | 5.38E-06 | phorbol-12-myristate-13-acetate-induced protein 1                      |
| ENSMMUG00000001952 | <i>SRGAP1</i>    | -1.31 | 5.76E-06 | SLIT-ROBO Rho GTPase activating protein 1                              |
| ENSMMUG00000001031 | <i>ABHD5</i>     | -0.91 | 7.26E-06 | abhydrolase domain containing 5, lysophosphatidic acid acyltransferase |
| ENSMMUG00000002517 | <i>PTPDC1</i>    | -2.16 | 9.59E-06 | protein tyrosine phosphatase domain containing 1                       |
| ENSMMUG00000021590 | <i>PCK2</i>      | -0.96 | 1.12E-05 | phosphoenolpyruvate carboxykinase 2, mitochondrial                     |
| ENSMMUG00000021759 | <i>TRIB1</i>     | -1.01 | 1.20E-05 | tribbles pseudokinase 1                                                |
| ENSMMUG00000043586 | <i>ID3</i>       | 0.93  | 1.21E-05 | inhibitor of DNA binding 3, HLH protein                                |
| ENSMMUG00000007419 | <i>FGF2</i>      | -1.01 | 1.21E-05 | fibroblast growth factor 2                                             |
| ENSMMUG00000041399 | <i>UBAP1L</i>    | -2.03 | 1.26E-05 | ubiquitin associated protein 1 like                                    |
| ENSMMUG00000002933 | <i>NR1D1</i>     | -1.30 | 1.33E-05 | nuclear receptor subfamily 1 group D member 1                          |
| ENSMMUG00000010514 | <i>SLC6A20</i>   | 0.92  | 1.37E-05 | solute carrier family 6 member 20                                      |
| ENSMMUG00000014219 | <i>OSGIN1</i>    | -1.04 | 1.47E-05 | oxidative stress induced growth inhibitor 1                            |
| ENSMMUG00000005217 | <i>HSPA5</i>     | -0.86 | 1.69E-05 | heat shock protein family A (Hsp70) member 5                           |
| ENSMMUG00000012895 | <i>PYCR1</i>     | -0.92 | 2.08E-05 | pyrroline-5-carboxylate reductase 1                                    |
| ENSMMUG00000011999 | <i>SLC38A1</i>   | -0.87 | 2.97E-05 | solute carrier family 38 member 1                                      |
| ENSMMUG00000048076 | <i>TNFRSF10B</i> | -0.88 | 2.97E-05 | TNF receptor superfamily member 10b                                    |
| ENSMMUG00000022163 | <i>SLC1A5</i>    | -0.86 | 3.18E-05 | solute carrier family 1 member 5                                       |
| ENSMMUG00000018907 | <i>ERFE</i>      | -1.12 | 3.39E-05 | erythroferrone                                                         |
| ENSMMUG00000017232 | <i>BMPER</i>     | -1.37 | 3.56E-05 | BMP binding endothelial regulator                                      |
| ENSMMUG00000045851 | <i>N/A</i>       | -0.86 | 4.54E-05 | N/A                                                                    |
| ENSMMUG00000007659 | <i>XPOT</i>      | -0.87 | 4.68E-05 | exportin for tRNA                                                      |
| ENSMMUG00000030046 | <i>FNIP2</i>     | -0.86 | 5.00E-05 | folliculin interacting protein 2                                       |
| ENSMMUG00000005742 | <i>CDCP1</i>     | -0.99 | 5.23E-05 | CUB domain containing protein 1                                        |
| ENSMMUG00000009063 | <i>ETS2</i>      | -0.84 | 5.27E-05 | ETS proto-oncogene 2, transcription factor                             |

|                    |                 |       |          |                                                                                                      |
|--------------------|-----------------|-------|----------|------------------------------------------------------------------------------------------------------|
| ENSMMUG00000018192 | <i>RORA</i>     | -1.24 | 5.41E-05 | RAR related orphan receptor A                                                                        |
| ENSMMUG00000009238 | <i>IL1RL1</i>   | -1.43 | 5.80E-05 | interleukin 1 receptor like 1                                                                        |
| ENSMMUG00000041498 | <i>TRAF1</i>    | -0.92 | 5.92E-05 | TNF receptor associated factor 1                                                                     |
| ENSMMUG00000016223 | <i>MYCL</i>     | -1.11 | 8.82E-05 | MYCL proto-oncogene, bHLH transcription factor                                                       |
| ENSMMUG00000023265 | <i>AKAP12</i>   | -0.82 | 9.82E-05 | A-kinase anchoring protein 12                                                                        |
| ENSMMUG00000031911 | <i>KRT18</i>    | -0.83 | 1.03E-04 | keratin 18                                                                                           |
| ENSMMUG00000014542 | <i>CHAC1</i>    | -1.06 | 1.17E-04 | ChaC glutathione specific gamma-glutamylcystotransferase 1                                           |
| ENSMMUG00000006127 | <i>CEBPG</i>    | -0.87 | 1.23E-04 | CCAAT enhancer binding protein gamma                                                                 |
| ENSMMUG00000019072 | <i>DAAM2</i>    | 0.81  | 1.55E-04 | dishevelled associated activator of morphogenesis 2                                                  |
| ENSMMUG00000044497 | <i>C15orf48</i> | -1.21 | 1.55E-04 | chromosome 15 open reading frame 48                                                                  |
| ENSMMUG00000019850 | <i>ALOXE3</i>   | -1.78 | 1.56E-04 | arachidonate lipoxygenase 3                                                                          |
| ENSMMUG00000021837 | <i>SARS1</i>    | -0.82 | 1.69E-04 | seryl-tRNA synthetase 1                                                                              |
| ENSMMUG00000040972 | <i>KCNK3</i>    | 1.24  | 2.31E-04 | potassium two pore domain channel subfamily K member 3                                               |
| ENSMMUG00000017327 | <i>SLAMF7</i>   | -2.39 | 2.59E-04 | SLAM family member 7                                                                                 |
| ENSMMUG00000012010 | <i>TMEM39A</i>  | -0.79 | 2.61E-04 | transmembrane protein 39A                                                                            |
| ENSMMUG00000010594 | <i>PTGFR</i>    | -0.99 | 2.96E-04 | prostaglandin F receptor                                                                             |
| ENSMMUG00000006971 | <i>ARF3</i>     | -0.93 | 3.22E-04 | ADP ribosylation factor 3                                                                            |
| ENSMMUG00000014952 | <i>NUP210L</i>  | -0.98 | 3.51E-04 | Nucleoporin 210 like                                                                                 |
| ENSMMUG00000019126 | <i>PNP</i>      | -0.76 | 3.65E-04 | purine nucleoside phosphorylase                                                                      |
| ENSMMUG00000013407 | <i>ADAMTS1</i>  | -0.95 | 4.34E-04 | ADAM metalloproteinase with thrombospondin type 1 motif 1                                            |
| ENSMMUG00000021189 | <i>RF02216</i>  | -1.06 | 4.70E-04 | N/A                                                                                                  |
| ENSMMUG00000015817 | <i>TMTC1</i>    | 0.77  | 5.14E-04 | transmembrane O-mannosyltransferase targeting cadherins 1                                            |
| ENSMMUG00000016418 | <i>CBX4</i>     | -0.79 | 5.80E-04 | chromobox 4                                                                                          |
| ENSMMUG00000009739 | <i>MTHFD2</i>   | -0.77 | 6.06E-04 | methylenetetrahydrofolate dehydrogenase (NADP+ dependent) 2, methenyltetrahydrofolate cyclohydrolase |
| ENSMMUG00000016074 | <i>LFNG</i>     | 1.19  | 7.22E-04 | LFNG O-fucosylpeptide 3-beta-N-acetylglucosaminyltransferase                                         |
| ENSMMUG00000011294 | <i>LSR</i>      | -0.72 | 8.12E-04 | lipolysis stimulated lipoprotein receptor                                                            |
| ENSMMUG00000010531 | <i>PTH1H</i>    | -1.81 | 8.80E-04 | parathyroid hormone like hormone                                                                     |
| ENSMMUG00000004719 | <i>GARS1</i>    | -0.73 | 8.95E-04 | glycyl-tRNA synthetase 1                                                                             |
| ENSMMUG00000000664 | <i>RRAS2</i>    | -0.74 | 9.23E-04 | RAS related 2                                                                                        |
| ENSMMUG00000007798 | <i>CLMP</i>     | -1.30 | 1.04E-03 | CXADR like membrane protein                                                                          |
| ENSMMUG00000012223 | <i>BCAT1</i>    | -1.00 | 1.04E-03 | branched chain amino acid transaminase 1                                                             |
| ENSMMUG00000021785 | <i>SHMT2</i>    | -0.70 | 1.08E-03 | serine hydroxymethyltransferase 2                                                                    |
| ENSMMUG00000018053 | <i>ZBTB21</i>   | -0.71 | 1.08E-03 | zinc finger and BTB domain containing 21                                                             |
| ENSMMUG00000013640 | <i>ZBTB43</i>   | -0.72 | 1.13E-03 | zinc finger and BTB domain containing 43                                                             |
| ENSMMUG00000014498 | <i>CACNA1E</i>  | -1.24 | 1.26E-03 | calcium voltage-gated channel subunit alpha1 E                                                       |
| ENSMMUG00000019974 | <i>NARS1</i>    | -0.71 | 1.29E-03 | asparaginyl-tRNA synthetase 1                                                                        |
| ENSMMUG00000005875 | <i>HSPA9</i>    | -0.66 | 1.33E-03 | heat shock protein family A (Hsp70) member 9                                                         |
| ENSMMUG00000003292 | <i>SLC38A10</i> | 0.71  | 1.33E-03 | solute carrier family 38 member 10                                                                   |
| ENSMMUG00000019018 | <i>SMAD6</i>    | 0.94  | 1.36E-03 | SMAD family member 6                                                                                 |
| ENSMMUG00000017631 | <i>NA</i>       | -0.77 | 1.45E-03 | secreted protein                                                                                     |
| ENSMMUG00000022066 | <i>UTP25</i>    | -0.78 | 1.45E-03 | UTP25 small subunit processor component                                                              |
| ENSMMUG00000007906 | <i>CDC42EP3</i> | -0.72 | 1.51E-03 | CDC42 effector protein 3                                                                             |
| ENSMMUG00000018058 | <i>ABCG1</i>    | -0.73 | 1.54E-03 | ATP binding cassette subfamily G member 1                                                            |
| ENSMMUG00000013865 | <i>SLC25A47</i> | -0.71 | 1.54E-03 | solute carrier family 25 member 47                                                                   |
| ENSMMUG00000012634 | <i>GTF2F2</i>   | -0.69 | 1.57E-03 | general transcription factor IIF subunit 2                                                           |
| ENSMMUG00000016294 | <i>SYCP2</i>    | -1.02 | 1.87E-03 | synaptonemal complex protein 2                                                                       |
| ENSMMUG00000019270 | <i>MTO1</i>     | -0.69 | 1.93E-03 | mitochondrial tRNA translation optimization 1                                                        |

|                     |                     |       |          |                                                                  |
|---------------------|---------------------|-------|----------|------------------------------------------------------------------|
| ENSMMUG00000010147  | <i>PLA2G15</i>      | 0.82  | 2.04E-03 | phospholipase A2 group XV                                        |
| ENSMMUG00000042787  | <i>N/A</i>          | -2.55 | 2.04E-03 | <i>N/A</i>                                                       |
| ENSMMUG00000040286  | <i>N/A</i>          | 1.10  | 2.16E-03 | <i>N/A</i>                                                       |
| ENSMMUG00000018116  | <i>JAG1</i>         | -0.89 | 2.17E-03 | jagged canonical Notch ligand 1                                  |
| ENSMMUG00000005778  | <i>FOXC1</i>        | -1.03 | 2.63E-03 | forkhead box C1                                                  |
| ENSMMUG00000041773  | <i>FABP5</i>        | -0.66 | 2.80E-03 | fatty acid binding protein 5                                     |
| ENSMMUG00000008094  | <i>DUSP4</i>        | -1.00 | 3.49E-03 | dual specificity phosphatase 4                                   |
| ENSMMUG00000008890  | <i>GTPBP2</i>       | -0.67 | 3.67E-03 | GTP binding protein 2                                            |
| ENSMMUG00000000511  | <i>CARS1</i>        | -0.64 | 4.11E-03 | cysteinyl-tRNA synthetase 1                                      |
| ENSMMUG00000019514  | <i>UAP1</i>         | -0.67 | 4.24E-03 | UDP-N-acetylglucosamine pyrophosphorylase 1                      |
| ENSMMUG00000000123  | <i>NHSL1</i>        | -0.86 | 4.27E-03 | NHS like 1                                                       |
| ENSMMUG000000021074 | <i>RASGEF1B</i>     | -0.88 | 4.27E-03 | RasGEF domain family member 1B                                   |
| ENSMMUG00000004628  | <i>IARS1</i>        | -0.63 | 4.28E-03 | isoleucyl-tRNA synthetase 1                                      |
| ENSMMUG00000003587  | <i>KLRC1</i>        | -1.33 | 5.12E-03 | killer cell lectin like receptor C1                              |
| ENSMMUG00000008539  | <i>UROS</i>         | 0.63  | 5.47E-03 | uroporphyrinogen III synthase                                    |
| ENSMMUG00000014175  | <i>SPRY4</i>        | -0.90 | 5.78E-03 | sprouty RTK signaling antagonist 4                               |
| ENSMMUG00000003585  | <i>ALG5</i>         | -0.66 | 6.95E-03 | ALG5 dolichyl-phosphate beta-glucosyltransferase                 |
| ENSMMUG00000015185  | <i>ERN1</i>         | -0.66 | 7.18E-03 | endoplasmic reticulum to nucleus signaling 1                     |
| ENSMMUG00000008653  | <i>FOSL1</i>        | -0.69 | 7.18E-03 | FOS like 1, AP-1 transcription factor subunit                    |
| ENSMMUG00000006548  | <i>KIAA1549</i>     | 0.80  | 7.94E-03 | KIAA1549                                                         |
| ENSMMUG00000001048  | <i>EAF2</i>         | -0.81 | 8.77E-03 | ELL associated factor 2                                          |
| ENSMMUG00000011209  | <i>BICDL1</i>       | 0.70  | 9.15E-03 | BICD family like cargo adaptor 1                                 |
| ENSMMUG00000007400  | <i>SIAH1</i>        | -0.63 | 9.25E-03 | siah E3 ubiquitin protein ligase 1                               |
| ENSMMUG00000001005  | <i>DDX21</i>        | -0.61 | 9.78E-03 | DExD-box helicase 21                                             |
| ENSMMUG00000013531  | <i>IPO5</i>         | -0.58 | 1.09E-02 | importin 5                                                       |
| ENSMMUG00000008003  | <i>LRRC8C</i>       | -0.59 | 1.17E-02 | leucine rich repeat containing 8 VRAC subunit C                  |
| ENSMMUG00000020365  | <i>ARHGAP18</i>     | -0.61 | 1.18E-02 | Rho GTPase activating protein 18                                 |
| ENSMMUG00000009833  | <i>SHC4</i>         | -1.12 | 1.22E-02 | SHC adaptor protein 4                                            |
| ENSMMUG00000020147  | <i>CSRNP1</i>       | -0.68 | 1.26E-02 | cysteine and serine rich nuclear protein 1                       |
| ENSMMUG00000002116  | <i>BTG3</i>         | -0.59 | 1.29E-02 | BTG anti-proliferation factor 3                                  |
| ENSMMUG00000004020  | <i>FUT1</i>         | -1.23 | 1.30E-02 | fucosyltransferase 1 (H blood group)                             |
| ENSMMUG00000010813  | <i>GTPBP4</i>       | -0.58 | 1.36E-02 | GTP binding protein 4                                            |
| ENSMMUG00000015774  | <i>NPM3</i>         | -0.58 | 1.47E-02 | nucleophosmin/nucleoplasmin 3                                    |
| ENSMMUG00000024570  | <i>LOC114677864</i> | -1.22 | 1.58E-02 | small nucleolar RNA SNORA70                                      |
| ENSMMUG00000039960  | <i>N/A</i>          | -1.62 | 1.70E-02 | <i>N/A</i>                                                       |
| ENSMMUG00000022394  | <i>EGFR</i>         | -0.56 | 1.98E-02 | epidermal growth factor receptor                                 |
| ENSMMUG00000018773  | <i>TM7SF2</i>       | 0.58  | 2.08E-02 | transmembrane 7 superfamily member 2                             |
| ENSMMUG00000003273  | <i>BCAM</i>         | 0.62  | 2.27E-02 | basal cell adhesion molecule (Lutheran blood group)              |
| ENSMMUG00000029011  | <i>UBXN8</i>        | -0.70 | 2.29E-02 | UBX domain protein 8                                             |
| ENSMMUG00000020839  | <i>SEPHS2</i>       | -0.65 | 2.33E-02 | selenophosphate synthetase 2                                     |
| ENSMMUG00000003288  | <i>GPT2</i>         | -0.64 | 2.35E-02 | glutamic--pyruvic transaminase 2                                 |
| ENSMMUG00000020408  | <i>HPGD</i>         | 0.80  | 2.48E-02 | 15-hydroxyprostaglandin dehydrogenase                            |
| ENSMMUG00000004706  | <i>IGSF9</i>        | 0.57  | 2.49E-02 | immunoglobulin superfamily member 9                              |
| ENSMMUG00000009012  | <i>FAM3A</i>        | 0.56  | 2.50E-02 | FAM3 metabolism regulating signaling molecule A                  |
| ENSMMUG00000022060  | <i>ARHGAP9</i>      | -1.86 | 2.55E-02 | Rho GTPase activating protein 9                                  |
| ENSMMUG00000014601  | <i>MYC</i>          | -0.56 | 2.55E-02 | MYC proto-oncogene, bHLH transcription factor                    |
| ENSMMUG00000019774  | <i>MTHFD1L</i>      | -0.54 | 2.72E-02 | methylenetetrahydrofolate dehydrogenase (NADP+ dependent) 1 like |
| ENSMMUG00000023225  | <i>E2F6</i>         | -0.69 | 2.83E-02 | E2F transcription factor 6                                       |
| ENSMMUG00000013848  | <i>FUT8</i>         | 0.57  | 3.03E-02 | fucosyltransferase 8                                             |
| ENSMMUG00000013984  | <i>ABLIM2</i>       | 0.81  | 3.15E-02 | actin binding LIM protein family member 2                        |
| ENSMMUG00000009112  | <i>TLR4</i>         | -0.80 | 3.17E-02 | toll like receptor 4                                             |
| ENSMMUG00000015917  | <i>ST6GALNAC4</i>   | -0.56 | 3.23E-02 | ST6 N-acetylgalactosaminide alpha-2,6-sialyltransferase 4        |

---

|                    |                 |       |          |                                                                 |
|--------------------|-----------------|-------|----------|-----------------------------------------------------------------|
| ENSMMUG00000030891 | <i>HYOU1</i>    | -0.53 | 3.42E-02 | hypoxia up-regulated 1                                          |
| ENSMMUG00000016290 | <i>WWC3</i>     | 0.52  | 3.46E-02 | WWC family member 3                                             |
| ENSMMUG00000010685 | <i>SPCS2</i>    | -0.53 | 3.47E-02 | signal peptidase complex subunit 2                              |
| ENSMMUG00000017946 | <i>ROGDI</i>    | 0.52  | 3.68E-02 | rogdi atypical leucine zipper                                   |
| ENSMMUG00000015968 | <i>CMPK2</i>    | -0.89 | 3.70E-02 | cytidine/uridine monophosphate kinase 2                         |
| ENSMMUG00000023390 | <i>TAX1BP3</i>  | 0.53  | 3.77E-02 | N/A                                                             |
| ENSMMUG00000008100 | <i>IRF1</i>     | -0.53 | 3.87E-02 | interferon regulatory factor 1                                  |
| ENSMMUG00000038480 | <i>EIF4EBP1</i> | -0.51 | 4.12E-02 | N/A                                                             |
| ENSMMUG00000042262 | <i>NOS1AP</i>   | 0.96  | 4.17E-02 | nitric oxide synthase 1 adaptor protein                         |
| ENSMMUG00000005670 | <i>RPS6KA2</i>  | -0.65 | 4.20E-02 | ribosomal protein S6 kinase A2                                  |
| ENSMMUG00000012511 | <i>GNL3</i>     | -0.53 | 4.26E-02 | G protein nucleolar 3                                           |
| ENSMMUG00000011328 | <i>CPEB1</i>    | -0.62 | 4.40E-02 | cytoplasmic polyadenylation element binding protein 1           |
| ENSMMUG00000001283 | <i>TP53I3</i>   | -0.51 | 4.43E-02 | tumor protein p53 inducible protein 3                           |
| ENSMMUG00000001172 | <i>SOHLH2</i>   | -1.29 | 4.49E-02 | spermatogenesis and oogenesis specific basic helix-loop-helix 2 |
| ENSMMUG00000020354 | <i>SLC3A2</i>   | -0.48 | 4.52E-02 | solute carrier family 3 member 2                                |
| ENSMMUG00000021653 | <i>AARS1</i>    | -0.51 | 4.78E-02 | alanyl-tRNA synthetase 1                                        |
| ENSMMUG00000001618 | <i>ATP6V0D2</i> | -4.77 | 4.67E-60 | ATPase H <sup>+</sup> transporting V0 subunit D2                |

---
